# 1 Chikungunya Virus Release is Reduced by TIM-1 Receptors Through 2 Binding of Envelope Phosphatidylserine

3

4 Judith M. Reyes Ballista <sup>a</sup>, Ashley J. Hoover <sup>a</sup>, Joseph T. Noble <sup>a</sup>, Marissa D. Acciani <sup>a</sup>, Kerri L. Miazgowicz  
5 <sup>a</sup>, Sarah A. Harrison <sup>a</sup>, Grace Andrea L. Tabscott <sup>a</sup>, Avery Duncan <sup>a</sup>, Don N. Barnes <sup>a</sup>, Ariana R. Jimenez <sup>a</sup>,  
6 Melinda A. Brindley <sup>a, b, #</sup>

7

8 <sup>a</sup> Department of Infectious Diseases, College of Veterinary Medicine, University of Georgia, Athens, GA,  
9 USA

10 <sup>b</sup> Department of Population Health, College of Veterinary Medicine, University of Georgia, Athens, GA,  
11 USA

12 # Correspondence: [mbrindle@uga.com](mailto:mbrindle@uga.com)

13

14 Running Title: TIM-1 limits CHIKV release

15 Abstract word count: 193

16 Text word count: 5925

## 17 **Abstract:**

18 T-cell immunoglobulin and mucin domain protein-1 (TIM-1) mediates entry of Chikungu-  
19 nya virus (CHIKV) into some mammalian cells through the interaction with envelope phospho-  
20 lipids. While this interaction enhances entry, TIM has been shown to tether newly formed HIV  
21 and Ebola virus particles, limiting their efficient release. In this study, we investigate the ability  
22 of surface receptors such as TIM-1 to sequester newly budded virions on the surface of infected  
23 cells. We established a luminescence reporter system to produce Chikungunya viral particles  
24 that integrate nano-luciferase and easily quantify viral particles. We found that TIM-1 on the  
25 surface of host cells significantly reduced CHIKV release efficiency in comparison to other entry  
26 factors. Removal of cell surface TIM-1 through direct cellular knock-out or altering the cellular  
27 lipid distribution enhanced CHIKV release. Over the course of infection, CHIKV was able to  
28 counteract the tethering effect by gradually decreasing the surface levels of TIM-1 in a process  
29 that appears to be mediated by the nonstructural protein 2. This study highlights the im-

30 portance of phosphatidylserine receptors in mediating not only the entry of CHIKV but also its  
31 release and could aid in developing cell lines capable of enhanced vaccine production.

32

### 33 **Importance:**

34 Chikungunya virus (CHIKV) is an enveloped alphavirus transmitted by the bites of infec-  
35 tious mosquitoes. Infection with CHIKV results in the development of fever, joint pain, and ar-  
36 thralgia that can become chronic and last for months after infection. Prevention of this disease is  
37 still highly focused on vector control strategies. In December 2023, a new live attenuated vac-  
38 cine against CHIKV was approved by the FDA. We aimed to study the cellular factors involved  
39 in CHIKV egress, to better understand CHIKV's ability to efficiently infect and spread among a  
40 wide variety of cell lines. We found that TIM-1 receptors can significantly abrogate CHIKV's  
41 ability to efficiently exit infected cells. This information can be beneficial for maximizing viral  
42 particle production in laboratory settings and during vaccine manufacturing.

43 **Keywords:** virus release; phosphatidylserine receptors, alphavirus, chikungunya

## 44 **INTRODUCTION**

45 Chikungunya virus (CHIKV) is an enveloped positive-sense RNA virus from the *Togaviridae*  
46 family. Within the alphavirus genus, CHIKV causes the most human infections and is transmit-  
47 ted by the bites of infectious *Aedes aegypti* and *Aedes albopictus* mosquitoes (1). Chikungunya  
48 disease presents with fever, joint pain, stiffness, and arthralgia with some patients experiencing  
49 severe joint pain for months after infection. During outbreaks, efforts to slow transmission and  
50 spread focused on decreasing the mosquito vector populations. In December 2023, the FDA ap-  
51 proved a new live attenuated vaccine for the prevention of CHIKV which will hopefully aid in  
52 slowing future outbreaks. We still lack antivirals to treat CHIKV infection, therefore, identifying  
53 potential targets of CHIKV replication cycle may provide new targets for the development of  
54 new therapeutics.

55 Chikungunya virus encodes four non-structural proteins (nsP1-nsP4) and five structural  
56 and accessory proteins (C, E3, E2, 6k, TF, and E1). While the non-structural proteins are respon-  
57 sible for transcription and genome replication, the structural proteins assemble to form particles.  
58 CHIKV particles are composed of a nucleocapsid core comprised of the RNA genome and capsid  
59 proteins, surrounded by a lipid envelope studded with glycoproteins (2). Structural studies ob-  
60 served the envelope E1-E2 spikes organized in a hexagonal lattice at the plasma membrane, the  
61 site of virus budding (3). As the nucleocapsid buds through the plasma membrane, both the  
62 capsid and glycoproteins are arranged in icosahedral shells (T=4) (3). Assembly of CHIKV is  
63 driven by the interaction of capsid protein and the cytoplasmic tail of the E2 protein (4–7).  
64 However, recent studies suggest that accessory proteins 6k and TF may also facilitate efficient  
65 exit of Sindbis virus, a closely related alphavirus (8).

66 While capsid and E2 interactions initiate CHIKV particle budding, subsequent events in-  
67 volving additional cellular proteins may be required for efficient release. Many enveloped vi-  
68 ruses utilize the cellular endosomal sorting complexes required for transport (ESCRT) proteins  
69 to complete the final membrane scission (9). Once newly formed particles are separated from the  
70 plasma membrane, the particles need to escape from the infected cell to perpetuate infection. The  
71 interferon-induced transmembrane protein, tetherin/BST-2, is a cellular surface protein that can  
72 inhibit the release of enveloped viruses including human immunodeficiency virus (HIV), Ebola,  
73 and CHIKV (10–13). Although previous studies have shed light on the mechanisms of alpha-  
74 virus budding, our knowledge of cellular factors that can alter particle release is limited.

75 Phosphatidylserine (PS) in the lipid envelope of viral particles influences multiple steps of  
76 the viral replication cycle (14). PS is an anionic phospholipid typically found on the inner leaflet  
77 of the plasma membrane (15). Apoptotic cells move PS to the outer leaflet which serves as a  
78 marker for cell clearance (16). This process is mediated by flippases, which translocate PS from  
79 the outer leaflet to the inner leaflet of the plasma membrane, and scramblases which  
80 non-specifically shuffle PS between the leaflets. Viral envelopes rich in PS can enter cells via  
81 apoptotic mimicry, where outer leaflet PS in the viral envelope attaches to PS receptors on the  
82 surface of the host cells. Our group and others showed that CHIKV entry in certain cell lines (*i.e.*,  
83 Vero cells) is mainly mediated through attachment to PS receptors, such as T cell immuno-

84 globulin mucin domain-1 (TIM-1) and receptor tyrosine kinase AXL (AXL) (17–19). Increased  
85 levels of PS in CHIKV's outer leaflet enhanced the specific infectivity of particles into Vero cells  
86 (17). While PS receptors can aid in virus entry, they can also modulate immune responses and  
87 reduce virion release. For example, PS receptors can prevent the efficient release of HIV and  
88 Japanese Encephalitis virus (JEV) by attaching to the viral envelope PS in newly budded parti-  
89 cles (20, 21). To our knowledge, no previous studies have noted the role of PS receptors in the  
90 viral particle release of alphaviruses.

91 In this study, we aimed to understand the role of PS receptors in the release of CHIKV par-  
92 ticles. To facilitate viral quantification, we utilized CHIKV tagged with a nano-luciferase directly  
93 integrated into viral particles. We found that cells lacking TIM-1 receptors released more CHIKV  
94 particles in comparison to their wildtype counterparts which sequestered particles through  
95 TIM-1 interaction. Likewise, cells producing exogenous TIM-1 released fewer particles. The  
96 change in particle release was directly attributed to the PS binding domain in TIM-1.  
97 Chikungunya infection counteracts this effect by reducing surface TIM levels as infection pro-  
98 ceeds. Cells producing nsP2 displayed reduced PS binding activity, suggesting it plays a role in  
99 counteracting TIM-1 in particle release. This study highlights an additional role of PS receptors  
100 in the CHIKV replication cycle.

## 101 RESULTS

### 102 **Chikungunya virus exhibits an increased release efficiency in Vero cells lacking PS receptors.**

103 We previously demonstrated that CHIKV entry in Vero cells is facilitated by PS receptors  
104 (17). While entry into Vero cells lacking both TIM-1 and AXL (Vero $\Delta$ TIM/AXL) was inefficient,  
105 the amount of virus produced from the cells was higher than expected. For example, when Vero  
106 and Vero $\Delta$ TIM/AXL cells are infected with an equivalent amount of CHIKV particles, viral pro-  
107 tein was poorly detected in Vero $\Delta$ TIM/AXL cell lysates and more readily detected in the super-  
108 natant containing released viral particles. (Figure 1A). If Vero $\Delta$ TIM/AXL cells are infected with  
109 ten times more virions, Vero and Vero $\Delta$ TIM/AXL cells display comparable levels of E1 protein  
110 (Figure 1A). We observed more CHIKV E1 protein in the supernatant from Vero $\Delta$ TIM/AXL than  
111 in parental cells and the release efficiency (ratio of protein levels in the supernatants over cell

112 lysates) was increased 4-fold in  $\Delta$ TIM/AXL cells (Figure 1A). This data suggests that while PS  
113 receptors mediate CHIKV entry into Vero cells, they can also decrease particle release.

114 To more readily quantify CHIKV viral release efficiency, we cloned nano-luciferase (NLuc)  
115 to the N-terminus of the E2 glycoprotein as previously described (Figure 1B) (22). The recombi-  
116 nant virus contains NLuc in the virion, therefore viral particles can be readily quantified using a  
117 standard luminescence assay. Purified CHIKV particles displayed three proteins (capsid, E1, and  
118 E2) and showed an increase of ~20kDa in the E2 protein, corresponding to the NLuc enzyme  
119 (Figure 1C). Each particle theoretically incorporates 240 NLuc attached to each E2 molecule in  
120 the particle. Similar ratios of capsid:E1:E2 were observed in both the parental and tagged viruses  
121 suggesting NLuc incorporation did not impede or alter particle formation (Figure 1C). While  
122 tagging the virus reduced CHIKV titers, it did not significantly alter the replication kinetics. Both  
123 tagged and untagged virus titers peaked around 48 hours after infection (Figure 1D). When  
124 comparing the NLuc levels to infectious titers over time (Figure 1E), we observed a consistent  
125 ratio of ~2700±500 RLU/TCID<sub>50</sub> U once infection was established (36hpi onward), suggesting  
126 consistent luciferase activity is associated with infectious virions.

127 To further investigate the role of PS receptors on CHIKV viral release, we infected Vero cells  
128 knocked out for TIM-1, AXL, or both TIM-1 and AXL with CHIKV-GFP-E2-NLuc and calculated  
129 release efficiency by comparing the luciferase activity present in the supernatant to the cell lysate  
130 levels. We observed that CHIKV particles were 2-3 times more efficiently released in Vero $\Delta$ TIM  
131 and Vero $\Delta$ TIM/AXL cells than in the parental cell line (Figure 2A). To ensure that this was not an  
132 artifact from the entry defect observed in cells lacking TIM-1 and AXL (Figure 2B), we repeated  
133 the experiment by adjusting the input virus amount (10x) to ensure similar cell lysate luciferase  
134 levels (Figure 2C-D). With similar entry levels, we observed that the ~300% increase in release  
135 efficiency was maintained and variability among trials was reduced (Figure 2C). In contrast, the  
136 release efficiency of Vesicular Stomatitis virus, another enveloped virus, was not affected by the  
137 lack of PS receptors on the surface of the cells (Figure 2E-F). We further confirmed the phenotype  
138 observed for CHIKV by omitting the viral entry step through the production of nano-luciferase  
139 tagged virus-like particles (VLPs) in the cells via plasmid transfection of a structural cassette.

140 CHIKV VLPs release efficiency similarly displayed a 3-fold increase in Vero $\Delta$ TIM/AXL cells  
141 (Figure 2G-H). Together these data indicate that cells lacking TIM release more CHIKV particles.

142 **The presence of PS receptors increases levels of cell-associated virus through binding to en-**  
143 **velope PS of budding virions.**

144 Our data in Vero cells suggested that TIM-1 limited CHIKV particle release to a greater ex-  
145 tent than AXL. TIM-1 is an integral membrane protein with a structure comprised of an  
146 N-terminal globular domain, a long highly glycosylated stem region, a transmembrane domain,  
147 and a cytoplasmic tail. The globular N-terminal domain contains the PS binding site (18, 23, 24).  
148 We hypothesized that TIM-1 binding to CHIKV envelope-PS decreases virion release from in-  
149 fected cells. Therefore, we asked if we could promote particle release by saturating TIM-1 with  
150 PS liposomes post-virus entry. Fluorescently labeled PC:PE:PS liposomes were added to infected  
151 Vero or Vero $\Delta$ TIM/AXL cells 6 hpi and release efficiency was calculated after 12 hours (Figure  
152 3A). The addition of liposomes caused a dose-dependent increase in release efficiency in paren-  
153 tal Vero cells but did not impact release in cells lacking PS receptors (Figure 3B). Exogenous ex-  
154 pression of hTIM-1 in parental Vero cells did not result in significant changes in the release effi-  
155 ciency of CHIKV (Fig 3C). Vero cells naturally produce TIM-1 and transfection is unable to in-  
156 crease TIM-1 levels further (17). In contrast, transfection of exogenous hTIM-1 in Vero $\Delta$ TIM/AXL  
157 cells significantly decreased the release efficiency of CHIKV (Figure 3D).

158 Next, we examined viral release in 293T cells producing different molecules known to me-  
159 diate CHIKV entry into mammalian cells (17, 19, 25, 26). 293T cells do not produce TIM-1, AXL,  
160 MXRA8 nor L-SIGN receptors (17, 27). Therefore, cells were transfected with plasmid expression  
161 vectors and release efficiency was compared to transfection of a plasmid encoding GFP for a  
162 control (Figure 3E). Similar to our previous data (17), production of TIM-1, MXRA8, and L-SIGN  
163 increased the entry efficiency of CHIKV as evidenced by the higher cell lysate luciferase activity  
164 (Supplemental Figure 1). TIM-1 production decreased particle release by ~75%, while AXL,  
165 MXRA8, and L-SIGN decreased particle decrease by approximately 50%. Transfection of a TIM-1  
166 mutant deficient in PS binding (N114D) (18) displayed similar release efficiency as GFP. These

167 data suggest that CHIKV particle release can be suppressed by the overproduction of entry fac-  
168 tors, although TIM-1 was the most efficient.

169 **Cellular knockout of CDC50a flippase subunit displays changes in Chikungunya virus entry,**  
170 **replication, and release efficiency.**

171 In our previous study, we produced PS-rich CHIKV particles by knocking out the flippase  
172 chaperone CDC50a, which increased outer leaflet PS in the plasma membrane of host cells (17).  
173 Unexpectedly, we observed phenotypic differences in CHIKV replication cycle in cells lacking  
174 CDC50a ( $\Delta$ CDC50) that may also indicate enhanced particle release. In this study, we aimed to  
175 further investigate the relationship between outer leaflet PS and CHIKV using human haploid  
176 (HAP1) and vervet monkey kidney (VeroS)  $\Delta$ CDC50 cells. CHIKV entered both HAP1 cell lines  
177 with similar efficiencies (Figure 4A). Yet, supernatant titers were consistently higher from  
178 CHIKV-infected HAP1 $\Delta$ CDC50 cells than parental HAP1 cells (Figure 4B). CHIKV virions  
179 produced in HAP1 $\Delta$ CDC50 cells contain higher levels of outer leaflet PS which results in higher  
180 particle specific infectivity when titrated on Vero cells (17). To determine if the higher titers  
181 observed in HAP1 $\Delta$ CDC50 cells were all due to the enhanced particle infectivity, we examined  
182 the release efficiency from the cells. We observed a mild increase in CHIKV release in  
183 HAP1 $\Delta$ CDC50 cells despite similar luminescence levels in the cell lysates (Figure 4C,  
184 Supplemental Figure 2A). This suggests that HAP1 $\Delta$ CDC50 cells release more particles which  
185 are more infectious when compared to parental HAP1 cells. Interestingly, we observed  
186 decreased levels of surface TYRO3 in uninfected HAP1 $\Delta$ CDC50 cells, which may enhance  
187 CHIKV release (Figure 4D). TYRO3 is the only known PS receptor produced in HAP1 cells.  
188 However, CHIKV does not rely solely on TYRO3 for entry in HAP1 cells (17), explaining why  
189 initial entry was not affected.

190 Unlike in HAP1 $\Delta$ CDC50 cells, CHIKV entry was dramatically decreased in VeroS $\Delta$ CDC50  
191 cells (Figure 5A). While few CHIKV particles were able to initiate infection in the two-hour entry  
192 assay, if CHIKV infection was not limited, there was cell-to-cell spread detected (Figure 5B).  
193 CHIKV infection required an additional 24 hrs in VeroS $\Delta$ CDC50 cells to obtain a similar number  
194 of GFP-positive cells (Figure 5B). Supernatant titers from VeroS cells were higher during the

195 early time points in the multi-cycle replication curve, but by 48 hr CHIKV-infected  
196 Vero $\Delta$ CDC50 cells produced higher titers than parental VeroS cells (Figure 5C). A stronger  
197 increase in release efficiency was observed in Vero $\Delta$ CDC50 cells in comparison to the  
198 HAP1 $\Delta$ CDC50 cells (Supplemental Fig 2B-C). To overcome the entry defect observed in  
199 Vero $\Delta$ CDC50 cells, we evaluated the release efficiency after infecting Vero $\Delta$ CDC50 with five  
200 times more virus than parental cells (Fig 5D). This led to similar levels of luminescence in the cell  
201 lysates of parental and Vero $\Delta$ CDC50 cells (Supplemental Fig 2D). VeroS cells lacking CDC50a  
202 activity produced 3-4 fold more CHIKV particles than parental VeroS cells (Figure 5D).  
203 Transfection of a plasmid encoding CDC50a in Vero $\Delta$ CDC50 cells significantly decreased the  
204 release efficiency of CHIKV (Figure 5E).

205 CHIKV entry into VeroS cells is dependent on TIM-1 (17). Because Vero $\Delta$ CDC50 cells  
206 display altered PS distribution, we hypothesized that the surface levels of TIM-1, a PS receptor,  
207 might be affected. When we examined surface TIM-1 production in uninfected Vero $\Delta$ CDC50  
208 cells by surface staining (Figure 5F) and binding of fluorescently labeled PC:PE:PS liposomes  
209 (Figure 5G), we noted a decrease that may explain both the decrease in CHIKV entry into  
210 Vero $\Delta$ CDC50 cells and the enhanced CHIKV release phenotype.

### 211 **CHIKV release efficiency correlates with the presence of phospholipid-binding receptors** 212 **across cell lines.**

213 To examine the correlation between cell surface PS receptors and release efficiency, we  
214 compared a panel of cell lines. To evaluate the presence of phospholipid binding receptors across  
215 cell lines without species-specific antibodies, we used fluorescently labeled PC:PE:PS liposomes  
216 and quantified cellular binding through flow cytometry (Figure 6A-B). We then assessed CHIKV  
217 particle release in each cell line (Figure 6C, Supplemental Figure 3). Surprisingly, CHIKV dis-  
218 played the highest levels of release in BSR-T7/5 cells. Similar findings were previously evidenced  
219 with BHK cells in Ramjag, et al., 2022 (22). We observed an inverse correlation between PC:PE:PS  
220 liposome binding and particle release in Vero, VeroS, Vero $\Delta$ TIM/AXL, Aag2, and BSR-T7/5 cells  
221 (Figure 6D). The release efficiency in mosquito cell lines, C6/36 and Aag2, was similar to that of  
222 Vero cells despite not having any identified TIM or AXL homologs. Surprisingly, Aag2 cells



223 displayed liposome binding levels two-fold above background strongly suggesting the presence  
224 of PC:PE:PS binding receptors in these cells. This data further demonstrates the strong effect that  
225 phospholipid binding receptors have on the release of CHIKV virions.

### 226 **TIM-1 is downregulated from the cell surface following CHIKV infection.**

227 To enhance particle release and prevent superinfection, many viruses downregulate viral  
228 receptors (28–30). This downregulation can be through receptor saturation and subsequent en-  
229 docytosis or direct receptor degradation (21, 31). For example, Japanese encephalitis virus (JEV)  
230 counteracts AXL's viral release inhibition by inducing AXL degradation through the ubiquiti-  
231 nation pathway (21). Alternatively, HIV encodes an accessory protein, Nef, which induces the  
232 engulfment of TIM, reducing TIM protein from the cell surface (31). To examine if TIM-1 levels  
233 are changed by CHIKV infection, we infected VeroS cells and monitored TIM-1 levels on the  
234 plasma membrane. CHIKV infection decreased TIM-1 levels (Figure 7A) and the ability of cells  
235 to bind PC:PE:PS liposomes (Figure 7B). To determine if this difference was specific to TIM-1,  
236 cells were mock infected, infected with CHIKV-GFP or with Lymphocytic Choriomeningitis vi-  
237 rus (LCMV)-GFP, and surface proteins were labeled with biotin when 90% of the cells were  
238 positive for GFP production (Figure 7C). Total cell lysates and purified surface biotinylated  
239 proteins were separated on an SDS-PAGE gel and visualized on a BioRad stain-free gel (Figure  
240 7D). We found few differences between mock and infected cells, except for the production of the  
241 CHIKV envelope protein which was enriched in the surface fraction (Figure 7D, Supplemental  
242 Figure 4). This suggests that CHIKV infection does not cause a global decrease in the production  
243 of surface proteins. Yet, immunoblot analysis displayed an 85% reduction of TIM-1 levels in pu-  
244 rified surface proteins, while transferrin and AXL levels decreased by ~40% in CHIKV-infected  
245 cells (Figure 7E). Infection with LCMV only decreased TIM-1 and AXL surface levels by ~15%  
246 and ~10%, respectively, and increased levels of transferrin by ~40% (Figure 7E).

247 To further understand the mechanism of surface TIM-1 downregulation we evaluated the  
248 timing of this phenotype. Cell surface TIM-1 levels were first reduced around 6-9hpi, concurring  
249 with E1 detection (Figure 8A Supplemental Figure 5A-B), and continued to decrease over time.  
250 After 12-15hr after infection, we observed a decrease of ~50% in the binding of fluorescently la-

251 beled liposomes (Figure 8B-C). To determine if a specific CHIKV protein triggers the decrease in  
252 surface TIM-1 levels, we transfected VeroS cells with plasmids encoding each of CHIKV's pro-  
253 teins. Production of each viral protein was confirmed through immunoblots (Supplemental  
254 Figure 5C-D). We observed a decrease in PC:PE:PS liposome binding after the production of  
255 CHIKV nsP2 (Figure 8D). This data suggests that the decrease of TIM-1 in infected cells might be  
256 mediated through the viral protease nsP2.

## 257 DISCUSSION

258 Our study provides evidence that surface receptors can prevent efficient CHIKV viral re-  
259 lease. TIM-1 appeared to be more effective than TAM family receptors (*i.e.*, AXL) and other entry  
260 factors (*i.e.*, MXRA8 or L-SIGN) at preventing virions from completing their egress from infected  
261 cells. We propose that the release inhibition observed in Vero cells is mediated through the in-  
262 teraction between the PS binding domain of TIM-1 and the lipid envelope surrounding CHIKV  
263 particles (Figure 9). CHIKV entry is efficiently mediated by different molecules depending on  
264 the cell line (17). Presumably, these same factors that mediate entry can also capture newly  
265 formed particles, ultimately reducing release. When various entry factors were transfected into  
266 293T cells we observed they each reduced release, and TIM-1 was most effective. While most of  
267 the work presented here focused on Vero cells and TIM-1, the main entry receptor for CHIKV in  
268 these cells, we hypothesize removal of entry receptors important to other cell types would also  
269 enhance CHIKV release.

270 PS receptors from the TIM and TAM families interact with PS differently, which may con-  
271 tribute to phenotypic differences observed in viral release. Receptors from the TAM family, in-  
272 cluding TYRO3 and AXL, require a bridging ligand known as Gas6 (32). Previous studies  
273 demonstrate this cofactor is present in the fetal bovine serum supplemented in the media of  
274 tissue culture cells at concentrations typically required to bridge cell-PS binding (33). Although  
275 our infections took place in serum-containing media, AXL and/or Gas6 levels may not have been  
276 sufficient to link newly formed particles to the cell surface as well as TIM-1. CHIKV particles are  
277 made up of a highly organized lattice of glycoproteins with limited access to the lipid layer (2).  
278 Gas6 may not be able to access CHIKV PS as well as TIM-1 limiting the TAM family's ability to

279 both mediate entry and reduce particle release. While we did not find a role for AXL in limiting  
280 CHIKV release in Vero cells, it is important to recognize that AXL can inhibit the release of other  
281 viral particles, as is the case for Japanese Encephalitis virus (JEV) (21).

282 HIV, JEV, and Ebola virus release is limited by PS receptors (20, 21). We found that particle  
283 retention by TIM and AXL could significantly reduce CHIKV release, but was not able to sig-  
284 nificantly reduce Vesicular Stomatitis virus (VSV) release. VSV infection consistently produces  
285 higher titers after a single round of infection compared to CHIKV, this may enable VSV to  
286 quickly saturate the PS binding sites and produce enough particles that limit the ability to ob-  
287 serve a release defect. This phenotype could be general for a wider variety of enveloped viruses  
288 and may suggest viruses that produce fewer virions per cell may be impacted more than viruses  
289 that produce larger quantities of particles.

290 We observed that increased release efficiency correlated with decreases in levels of surface  
291 receptors not only in Vero $\Delta$ TIM/AXL but also in cells knocked out for the flippase subunit  
292 CDC50a. Cells knocked out for CDC50a lack flippase activity resulting in increased levels of  
293 outer leaflet PS, possibly leading to failure in efficient redistribution of their lipids to accom-  
294 modate integral proteins. In general, transmembrane proteins (*e.g.*, TIM, AXL, TYRO3) can dis-  
295 rupt fluidity within the plasma membrane which can trigger changes in the translocation of  
296 specific lipids (34). Additionally, the composition of the plasma membrane can prevent the in-  
297 sersion of receptors into the bilayer and induce changes in their topological orientation (34–36).  
298 TIM proteins have been shown to preferentially enter the lipid bilayer among unsaturated  
299 phospholipids rather than saturated ones (35). Consequently, we hypothesize that  $\Delta$ CDC50 cells  
300 might undergo a redistribution of membrane proteins and a decrease in the proper insertion of  
301 these membrane receptors (*i.e.*, TIM and TYRO3), resulting in increased CHIKV release.

302 CHIKV infection decreased cell surface TIM-1 in a mechanism possibly mediated by nsP2  
303 protease. While infection also reduced surface proteins AXL and transferrin, surface TIM levels  
304 were more significantly depleted. nsP2 shuts off cellular transcription and has been suggested to  
305 be one of the main factors behind superinfection exclusion in alphaviruses by interfering with  
306 the formation of replication complexes of incoming viruses (37–39). Therefore, the

307 CHIKV-induced receptor decrease may not be specific, but might disproportionately affect sur-  
308 face proteins with shorter half-lives such as TIM (half-life <2hrs) (31).

309 CHIKV release efficiency among cell lines correlated with the presence of phospholipid  
310 binding receptors. We found that the release efficiency of mosquito cells C6/36 and Aag2 was  
311 similar to that of Vero cells, which express TIM-1 and AXL receptors. Aag2 cells were able to  
312 significantly bind PS-containing liposomes, although previous studies have failed to identify  
313 homologs for PS receptors in mosquito cells. Future studies should further explore cellular re-  
314 ceptors that might be playing a role in preventing the efficient exit of viral particles in these cells.  
315 Mosquito cells display potential budding of alphaviruses from internal membranes such as cy-  
316 topathic vacuoles (40). It would be interesting if PS receptors or other cellular proteins present in  
317 these vacuoles could attach to new virions before they reach the cell surface. This mechanism  
318 would not be surprising as viruses such as JEV that bud from the endoplasmic reticulum have  
319 been shown to bind to AXL (21).

320 This study provides evidence for the importance of PS receptors during the egress of  
321 CHIKV. The ability of CHIKV to counteract this inhibition might result in higher levels of dis-  
322 ease spread inside the host's body. However, the significant increase in the production of viral  
323 particles from cells lacking TIM-1 and increased infectivity of virions previously observed in  
324  $\Delta$ CDC50 cells (17) could be employed to maximize particle production during vaccine devel-  
325 opment. Further studies should characterize the extent to which PS receptors could inhibit the  
326 efficient egress of other highly pathogenic enveloped viruses.

## 327 MATERIALS AND METHODS

### 328 Cells

329 All mammalian cell lines were maintained at 37°C and 5% CO<sub>2</sub>. Parental monkey Vero cells  
330 and Vero cells knocked out for TIM (Vero $\Delta$ TIM), AXL (Vero $\Delta$ AXL), and both (Vero $\Delta$ TIM/AXL)  
331 were a gift from Dr. Wendy Maury from the University of Iowa (41). All Vero cells, including  
332 Vero-humanSLAM (VeroS) (42) and VeroS knocked out for CDC50a chaperone (VeroS $\Delta$ CDC50)  
333 (17), and BHK stably expressing T7 RNA polymerase (BSR-T7/5) (43) cells were maintained in  
334 DMEM supplemented with 5% FBS. Parental human haploid cells (HAP1) and HAP1 knocked

335 out for CDC50a (HAP1ΔCDC50) cells were purchased from Horizon Discovery and maintained  
336 in Iscoves' modified Dulbecco's Medium (DMEM) supplemented with 8% fetal bovine serum  
337 (FBS). Human 293T cells and human osteosarcoma U2OS, a gift from Dr. Neale Ridgway from  
338 Dalhousie University (44), were maintained with DMEM media supplemented with 10% FBS.  
339 Mosquito cell lines were kept at 28°C and maintained in Leibovitz's L-15 media supplemented  
340 with 10% FBS (C6/36 – *Aedes albopictus*) or HyClone SFX-Insect media supplemented with 2%  
341 FBS (Aag2 - *Aedes aegypti*).

## 342 **Viruses**

343 All Chikungunya infections were performed using the attenuated vaccine strain 181 clone 25  
344 (181/c25). Full-length CHIKV genome was untagged (CHIKV), encoded *gfp* as an additional  
345 transcription unit between the non-structural and structural gene (CHIKV-GFP) (45) or con-  
346 tained NLuc inserted at the N-terminus of E2 (CHIKV-E2-NLuc, CHIKV-GFP-E2-NLuc). The  
347 described changes were introduced into the molecular clone pSinRep5-181/25c (Addgene cat.  
348 60078), a gift from Dr. Terrance Dermody. To recover the virus, plasmids were linearized and *in*  
349 *vitro* transcribed with the mMessage mMachine SP6 transcription kit (Invitrogen, cat. AM1340)  
350 per the manufacturer's protocol to produce the full-length positive-sense mRNA which was  
351 transfected into Vero cells using Lipofectamine 3000 following the manufacturer's instructions.  
352 Vesicular Stomatitis virus (VSV) used to perform release efficiency assays was tagged with  
353 nano-luciferase in the coding region of the matrix protein (M) following residue 37 and encodes  
354 GFP as an additional transcriptional unit at a post-G site (VSV -M-NLuc-GFP) as described in  
355 (46, 47). Tri-segmented attenuated lymphocytic choriomeningitis virus encoding GFP  
356 (LCMV-GFP) was a gift from Dr. Luis Martínez-Sobrido (48). CHIKV and VSV stocks were  
357 propagated using Vero cells and LCMV stocks were propagated in BSR-T7/5 cells. All stocks  
358 were titrated on Vero cells using serial dilutions to determine the tissue culture infection dose 50  
359 (TCID<sub>50</sub>) according to the Spearman-Kärber method.

## 360 **Virus Release Assays: Immunoblots**

361 Vero or VeroΔTIM/AXL cells were plated in 10 cm<sup>2</sup> dishes at a density of 2.5×10<sup>6</sup> per plate,  
362 one day before infection. Cells were infected for one hour with CHIKV-GFP at an MOI of 0.5

363 (Vero,  $\Delta$ TIM/AXL 1x) or 5 ( $\Delta$ TIM/AXL 10x) and incubated at 37°C. Eighteen hours following  
364 infection, supernatants were collected, and cells were lysed in M2 lysis buffer (50 mM Tris [pH  
365 7.4], 150 mM NaCl, 1 mM EDTA, 1% Triton X-100) for 5 minutes and collected. Cell lysate  
366 samples were cleared by centrifuging at 6,000xg for 25 minutes. Supernatant samples were  
367 cleared twice at 6,000xg for five minutes and concentrated with ultracentrifugation over a 20%  
368 sucrose cushion for 3 hours at 28,000 rpm at 4°C. Purified pellets were resuspended in 200 $\mu$ l of 1x  
369 PBS. Cell lysates and purified supernatants were separated on an SDS-PAGE and analyzed  
370 through immunoblotting against vinculin as a loading control (1:2,000, MGA465GA, BioRad) or  
371 CHIKV E1 glycoprotein (1:1,000, MAB97792, R&D systems). Protein levels were quantified  
372 through Image Lab 6.1 densitometry analysis.

### 373 **Multi-step Replication Curves**

374 Vero, VeroS, and VeroS $\Delta$ CDC50 cells were plated at 2.5x10<sup>5</sup> cells/well in a 12-well plate  
375 while HAP1 and HAP1 $\Delta$ CDC50 cells were plated at a density of 3.0x10<sup>5</sup> cells/well. Cells were  
376 infected with untagged CHIKV or CHIKV-GFP-E2-NLuc at an MOI of 0.01 for one hour. At each  
377 indicated time point, supernatants were collected and replaced with corresponding media con-  
378 taining FBS. Samples were titrated by calculating the tissue culture infection dose 50 (TCID<sub>50</sub>) on  
379 Vero cells using the Spearman-Kärber method. Luminescence was quantified using the  
380 Nano-Glo Substrate (Promega) and measured in a GloMax Explorer (Promega) luminometer.

### 381 **Virus Release Assays: Luminescence**

382 Cells were plated in 24-well plates at a density of 2.5x10<sup>5</sup> cells/well, one day before infection.  
383 CHIKV inoculum was added for one hour at an MOI of 0.5 unless stated otherwise and incu-  
384 bated at 37°C. 18 hours following infection, supernatants were collected, and cells were lysed in  
385 M2 lysis buffer for 5 minutes and collected. Samples were cleared by centrifuging at 17,000xg for  
386 either 5 minutes (supernatants) or 25 minutes (cell lysates). Luminescence in supernatants and  
387 cell lysates was determined using the Nano-Glo Substrate (Promega) and measured in a GloMax  
388 Explorer (Promega) luminometer. Viral release was calculated as the ratio of luminescence in the  
389 supernatant divided by the luminescence in the cell lysates. Vesicular Stomatitis virus infections

390 were performed at an MOI of 1 for one hour and samples were harvested 8 hours post-infection  
391 as described above.

### 392 **Virus Release Assays: Transfections and Plasmids**

393 Vero and Vero $\Delta$ TIM/AXL cells were plated in a 24-well plate at a density of  $5 \times 10^4$  cells/well.  
394 The following day, cells were transfected with a plasmid encoding CHIKV's structural cassette  
395 (C, E3, E2, 6K, E1) with NLuc inserted at the N-terminus of E2 to produce luminescence viral-like  
396 particles (VLPs). Transfections were performed using Jet Optimus (Polyplus, #101000025) fol-  
397 lowing the manufacturer's protocol. Supernatants and cell lysates were collected 24 hours  
398 post-transfection and release assays were performed as described above.

399 Vero and Vero $\Delta$ TIM/AXL cells were also transfected with plasmids encoding hTIM-1-GFP  
400 or GFP using Jet Optimus. 24 hours following transfection, CHIKV inoculum was added at an  
401 MOI of 0.5 for one hour and supernatants and cell lysates were harvested 18 hours  
402 post-infection. Release assay was performed as described above.

403 293T cells were plated in a 24-well plate at a density of  $1.5 \times 10^5$  cells/well one day before  
404 transfections. The following day, cells were transfected with plasmids encoding hTIM-1-GFP,  
405 TIM-1-N114D, AXL, MXRA8, or L-SIGN using Jet Prime (Polyplus, #101000027) following the  
406 manufacturer's protocol. TIM plasmids were a gift from Dr. Wendy Maury (18). AXL  
407 (BC032229), MXRA8 (BC006213) (17), and L-SIGN (BC038851) plasmids were purchased from  
408 Transomic and if necessary, cloned into expression vectors. The following day, cells were in-  
409 fected, and release assays were performed as described above.

### 410 **Virus Release Assays: DioC<sub>18</sub>(3) PC:PE:PS liposomes**

411 PC:PE:PS liposomes (75% PC: 20% PE: 5% PS) were prepared as described in (49) with the  
412 addition of DiOC<sub>18</sub>(3) (3,3'-Diocadecyloxacarbocyanine Perchlorate) (Invitrogen, D275) for flu-  
413 orescence, following manufacturer's indications. Vero and Vero $\Delta$ TIM/AXL cells were plated at a  
414 density of  $2.5 \times 10^5$  cells/well in a 24-well plate. The next day, cells were infected at an MOI of 0.5  
415 for one hour. Six hours post-infection, DioC<sub>18</sub>(3) PC:PE:PS liposomes were added to the cells at  
416 the indicated concentrations. Supernatants and cell lysates were collected 18 hours post-infection  
417 and release assays were performed as described above.

## 418 **Entry Assays**

419 Cells were plated in a 48-well plate at a density of  $1 \times 10^5$  cells/well (HAP1, HAP1 $\Delta$ CDC50) or  
420 in a 24-well plate at  $1.25 \times 10^5$  cells/well (VeroS, VeroS $\Delta$ CDC50). The next day, cells were infected  
421 with enough CHIKV-GFP infectious viral particles to obtain approximately 50% of infected cells  
422 after 12 hours. Inoculum was removed from the cells after one hour and treated with 30 mM  
423 ammonium chloride (NH<sub>4</sub>Cl) after 2 hours to prevent subsequent rounds of infection. Infected  
424 cells were resuspended in PBS, fixed using 4% formaldehyde, and the percentage of GFP+ cells  
425 was quantified using a NovoCyte Quanteon cytometer (Agilent).

## 426 **Surface Biotinylation**

427 HAP1 and HAP1 $\Delta$ CDC50 cells were plated in a 6-well plate at a density of  $1 \times 10^6$  cells/well.  
428 Cells were either mock infected or infected one day after plating with CHIKV-GFP (MOI 0.5) or  
429 LCMV-GFP (MOI 1) and harvested at the indicated time points. Cells were washed with cold  
430 PBS, and surface proteins were biotinylated with 0.5 mg/mL sulfosuccinimidyl-2-(biotinamido)  
431 ethyl-1,3-dithiopropionate (ThermoFisher) on ice for 45 minutes with gentle shaking. The reac-  
432 tion was quenched using Tris-HCl and cells were lysed with M2 lysis buffer at 4°C. Samples  
433 were centrifuged at 17,000xg for 10 minutes. A fraction of the lysate was saved (total cell lysate,  
434 TCL), and the surface proteins were bound to streptavidin Sepharose beads overnight at 4°C (GE  
435 Healthcare). Beads were then washed with buffer containing 100 mM Tris, 500 mM lithium  
436 chloride, 0.1% Triton X-100 followed by a buffer containing 20 mM HEPES [pH 7.2], 2 mM  
437 EGTA, 10 mM magnesium chloride, 0.1% Triton X-100. Samples were then analyzed through  
438 immunoblotting probing against TYRO3 (1:1000, R&D Systems, MAB859100), TIM (TIM (1:500,  
439 AF1750, R&D Systems), AXL (1:100, AF154, R&D Systems), GAPDH (1:2000, Santa Cruz Biotech,  
440 #sc-47724), Transferrin (1:1,000, PA5-27739, ThermoFisher), or CHIKV E1 (1:1,000, MAB97792,  
441 R&D systems).

## 442 **Cell-to-cell Spread Kinetics**

443 VeroS and VeroS $\Delta$ CDC50 were plated in a 24-well plate at a density of  $1.25 \times 10^5$  cells/well.  
444 One day after plating, cells were infected with CHIKV-GFP at an MOI of 0.1 for one hour. At the  
445 indicated time points, cells were lifted using trypsin, resuspended in PBS, and fixed in 4% for-



446 maldehyde. A NovoCyte Quanteon cytometer (Agilent) was used to analyze 10,000 live cells and  
447 quantify the percentage of GFP+ cells over time.

#### 448 **Surface Receptor Staining**

449 Cells were plated at a density of  $1.0 \times 10^6$  cells/well in a 6-well plate one day prior to staining.  
450 Cells were harvested either uninfected or after infection with CHIKV-GFP at an MOI of 0.5, 18  
451 hours post-infection. Monolayers were cooled, washed, and treated with a blocking solution  
452 (dPBS +Ca<sup>2</sup> +Mg<sup>2</sup> with 2% (v/v) FBS) containing an anti-hTIM1(1:50-1:100, AF1750, R&D Sys-  
453 tems) antibody. Samples were incubated at 4°C with gentle shaking for one hour and washed  
454 three times with ice-cold PBS. A blocking solution containing the corresponding secondary an-  
455 tibody, donkey anti-goat Alexa Fluor 594 (1:2500, A32758, Invitrogen), was added. Samples were  
456 incubated at 4°C in the dark with gentle shaking for 30 minutes. Samples were washed three  
457 additional times with PBS, lifted via scraping, and analyzed using a NovoCyte Quanteon cy-  
458 tometer (Agilent). Populations of live, single cells were gated using FSC/SSC and SSC-A/SSC-H,  
459 respectively. The GFP gate was set using uninfected, GFP- cells, and the AF594 gate was set with  
460 a secondary-only control. The AF594 MFI of 10,000 live, single, GFP+ cells was quantified. A  
461 488-nm laser with a 530/30 “FITC” bandpass filter was used to assess GFP fluorescence, and  
462 AF594 was measured with a 561-nm laser with a 615/20 “PE-Texas Red” bandpass filter; all filter  
463 sets had default gain.

#### 464 **Liposome binding assay**

465 For comparison of liposome binding among different cell lines, cells were plated in a  
466 12-well plate at a density of  $5 \times 10^5$  cells/well, and binding was assessed the following day. For  
467 assessing liposome binding following infection, VeroS cells were plated at a density of  $2.5 \times 10^5$   
468 cells/well in a 12-well plate. CHIKV inoculum was added at an MOI of 0.5 for 1hr and binding  
469 was assessed after 18hrs. To evaluate the effect of CHIKV’s proteins on liposome binding, VeroS  
470 cells were plated in a 24-well plate at a density of  $1 \times 10^5$  cells/well. The following day, cells were  
471 transfected with plasmids encoding for CHIKV’s non-structural proteins with a FLAG tag (nsP1,  
472 nsP2, nsP3, and nsP4), a structural cassette (C, E3, E2, 6K, E1), capsid, E 181/25 (Southeast Asian  
473 strain) or E S27 (African strain). Plasmid encoding E S27 was a gift from Dr. Graham Simmons

474 (50). Transfections were performed using Jet Optimus (Polyplus, #101000025) following the  
475 manufacturer's protocol. Two days following transfection, binding was assessed.

476 To measure liposome binding, cells were placed on ice for 30 minutes. DiOC<sub>18</sub>(3) PC:PE:PS  
477 liposomes were sonicated for 1 hour and added to the cells at a final concentration of 10 $\mu$ M.  
478 Liposomes were bound to cells for 1 hour on ice, removed, and washed with FBS-free media.  
479 Cells were lifted in FBS-free media and fixed in equal volume of 4% formaldehyde.

480 Samples were analyzed using a NovoCyte Quanteon cytometer (Agilent). Populations were  
481 gated using SSC-H/FSC-H and SSC-A/SSC-H to identify live and single cells, respectively. A  
482 488-nm laser with a 530/30 "FITC" bandpass filter was used to assess DiOC<sub>18</sub>(3) fluorescence. A  
483 DiOC<sub>18</sub>(3)<sup>+</sup> gate was set using non-liposome-treated cells as a DiOC<sub>18</sub>(3)<sup>-</sup> control. The DiOC<sub>18</sub>(3)  
484 MFI of 10,000 live, single events was quantified.

#### 485 **Statistical Analysis**

486 All graphs were made and analyzed using GraphPad Prism (v10.1.1, macOS). An unpaired  
487 parametric student's T-test was performed to determine the significance between two groups.  
488 For data determining statistical significance among two groups where data was normalized, a  
489 Welch's correction was used. For logarithmic data, values were first natural log (ln) transformed  
490 and then analyzed with T-tests. An ordinary one-way ANOVA with multiple comparisons was  
491 used to evaluate statistical differences among more than two groups with non-normalized data.

#### 493 **FIGURE CAPTIONS**

494 **Figure 1. Nano luciferase tag serves as a measure for quantification of CHIKV viral particles.**  
495 **(A)** Immunoblot analysis of total lysates and supernatants harvested from CHIKV-infected Vero  
496 and Vero $\Delta$ TIM/AXL cells. Cells were infected with CHIKV-GFP at 0.5 (1x) or 5 (10x) MOI. Total  
497 cell lysates and purified supernatants were probed against CHIKV E1 or vinculin as a control.  
498 **(B)** Diagram of CHIKV-GFP-E2-NLuc virus genome used for release efficiency assays. Nano  
499 luciferase (NLuc) was inserted at the N-terminus of E2. Created in BioRender.com **(C)** Vero cells  
500 were infected with either CHIKV-GFP or CHIKV-GFP-E2-NLuc. Supernatants were purified

501 through ultracentrifugation and analyzed using a stain-free gel. **(D)** Multi-step replication curve  
502 of CHIKV and CHIKV-GFP-E2-NLuc in Vero cells (0.01 MOI) was harvested at each indicated  
503 time point. **(E)** Ratio between TCID<sub>50</sub>/mL and Relative Luminescence Units (RLU) from sam-  
504 ples harvested in the multi-step replication curve of cells infected with CHIKV-GFP-E2-NLuc.  
505 Data represents the mean  $\pm$ SEM from at least three independent trials.

506 **Figure 2. CHIKV particles are released more efficiently from Vero cells lacking TIM-1.** Re-  
507 lease efficiency assay of CHIKV-GFP-E2-NLuc in Vero, Vero $\Delta$ TIM, Vero $\Delta$ AXL, and  
508 Vero $\Delta$ TIM/AXL cells (MOI 0.5, harvested at 18 hours) **(A)** and corresponding levels of lumines-  
509 cence present in the total cell lysates (TCL) and supernatants (sup) **(B)**. Release efficiency assay  
510 with Vero $\Delta$ TIM/AXL cells infected with ten times more CHIKV-GFP-E2-NLuc than Vero cells  
511 **(C)** and corresponding luminescence levels **(D)**. Release efficiency assay of VSV-GFP-M-NLuc  
512 in Vero, Vero $\Delta$ TIM, Vero $\Delta$ AXL, and Vero $\Delta$ TIM/AXL cells (MOI of 1, harvested at 8hrs) **(E)** and  
513 corresponding luminescence levels **(F)**. Release efficiency assay of CHIKV VLPs in Vero and  
514 Vero $\Delta$ TIM/AXL cells transfected with a plasmid encoding CHIKV's structural cassette tagged  
515 with nano-luciferase **(G)** and corresponding luminescence levels **(H)**. Data represent the mean  
516  $\pm$ SEM from at least three independent trials. For each release assay, data was normalized to the  
517 parental cell line to determine the relative release efficiency. Unpaired parametric Student's  
518 t-test with unequal variance (Welch's correction) was performed to determine statistical signifi-  
519 cance in comparison to the parental cell line. \*,  $p < .05$ .

520 **Figure 3. Chikungunya binds to the phospholipid binding domain of TIM-1, preventing its**  
521 **efficient release.** **(A)** Experimental design for fluorescent liposome competition during release  
522 of CHIKV-infected Vero and Vero $\Delta$ TIM/AXL cells. Created in BioRender.com **(B)** Increasing  
523 concentrations of fluorescent PC:PE:PS liposomes were added to CHIKV-E2-NLuc infected Vero  
524 or Vero $\Delta$ TIM/AXL cells 6 hpi and release efficiency was calculated 18hrs post-infection. Data  
525 was normalized to the no-liposome control of each cell line. Vero **(C)** and Vero $\Delta$ TIM/AXL **(D)**  
526 cells were transfected with a plasmid encoding hTIM-1 and infected with CHIKV-E2-NLuc 24

527 hours following transfection. Release efficiency was calculated 18hrs post-infection. **(E)** 293T  
528 cells were transfected with plasmids encoding the indicated surface receptors and infected with  
529 CHIKV-E2-NLuc 24 hours following transfection. Release efficiency was calculated 18hrs  
530 post-infection. Data was normalized to the GFP-transfected control. Data represents the mean  
531  $\pm$ SEM from at least three independent trials. Unpaired parametric Student's t-test with unequal  
532 variance (Welch's correction) was performed to determine statistical significance in comparison  
533 to the parental cell line. \*,  $p < .05$ ; \*\*,  $p < .01$ ; \*\*\*,  $p < .001$ .

534 **Figure 4. CHIKV displays an increase in release efficiency in HAP1 $\Delta$ CDC50 cells and a de-**  
535 **crease in surface receptor Tyro3. (A)** Entry efficiency of CHIKV-GFP in HAP1 and  
536 HAP1 $\Delta$ CDC50 cells. **(B)** Multi-cycle replication curve of CHIKV in HAP1 and HAP1 $\Delta$ CDC50  
537 cells (MOI 0.01). **(C)** Release efficiency of CHIKV-GFP-E2-NLuc in HAP1 and HAP1 $\Delta$ CDC50.  
538 Data was normalized to the release efficiency of the parental cell line to determine the relative  
539 release efficiency. **(D)** Surface biotinylation analysis of uninfected HAP1 and HAP1 $\Delta$ CDC50  
540 cells. Total lysates and surface proteins were probed using a Tyro3 antibody or Actin antibody  
541 as a loading control. Data represents the mean  $\pm$ SEM from at least three independent trials.  
542 Unpaired parametric Student's t-test was performed to determine statistical significance in  
543 comparison to the parental cell line at each indicated timepoint. An unequal variance (Welch's  
544 correction) t-test was performed for normalized data. \*,  $p < .05$ ; \*\*,  $p < .01$ ; \*\*\*,  $p < .001$ .

545 **Figure 5. CHIKV entry is reduced, yet release is enhanced in VeroS $\Delta$ CDC50 cells. (A)** Entry  
546 efficiency of CHIKV-GFP in VeroS and VeroS $\Delta$ CDC50 cells. **(B)** CHIKV-GFP spread in VeroS  
547 and VeroS $\Delta$ CDC50 cells (MOI 0.1). **(C)** Multi-cycle replication curve CHIKV in VeroS and  
548 VeroS $\Delta$ CDC50 cells (MOI 0.01). Supernatants were harvested and titrated at the indicated time  
549 points. **(D)** Release efficiency assay of CHIKV-GFP-E2-NLuc when five times more virus as  
550 added to VeroS $\Delta$ CDC50 than Vero cells to equalize cell lysate luminescence levels. **(E)**  
551 VeroS $\Delta$ CDC50 cells were transfected with a plasmid encoding CDC50a and infected with  
552 CHIKV-E2-NLuc, release efficiency was assessed 18 hours post-infection. Surface receptors of

553 VeroS (green) and VeroS $\Delta$ CDC50a (blue) were assessed via staining using **(F)** a TIM-1 antibody  
554 or **(G)** binding of DioC<sub>18</sub>(3) fluorescent PC:PE:PS liposomes and analyzed through flow cytome-  
555 try. Data represents the mean  $\pm$ SEM from at least three independent trials. Unpaired parametric  
556 Student's t-test was performed to determine statistical significance in comparison to the paren-  
557 tal cell line at each indicated timepoint. An unequal variance (Welch's correction) t-test was  
558 performed for normalized data. \*,  $p < .05$ ; \*\*,  $p < .01$ ; \*\*\*,  $p < .001$ ; \*\*\*\*,  $p < .0001$ .

559 **Figure 6. CHIKV release efficiency correlates with PC:PE:PS liposome binding in a panel of**  
560 **cell lines. (A)** Representative histograms of binding of fluorescent liposomes in Vero and  
561 Vero $\Delta$ TIM/AXL cells as a measure for phospholipid binding receptors. **(B)** Fold binding of flu-  
562 orescent PC:PE:PS liposomes in mammalian and mosquito cell lines. To remove differences in  
563 fluorescent background levels among cell lines, fold binding was determined by calculating the  
564 ratio of DioC<sub>18</sub>(3) mean fluorescent intensity (MFI) over no-liposome control for each cell line.  
565 The dotted line represents the threshold where DioC<sub>18</sub>(3) MFI was equivalent to no-liposome  
566 background levels indicating no binding occurred. **(C)** The release efficiency of  
567 CHIKV-GFP-E2-NLuc in a panel of mammalian and mosquito cell lines. **(D)** Correlation analy-  
568 sis between liposome binding and CHIKV release efficiency. The size of circles represents the  
569 degree of liposome binding and colors indicate levels of release efficiency. Data represents the  
570 mean  $\pm$ SEM from at least three independent trials.

571 **Figure 7. CHIKV infection decreases surface levels of TIM-1.** Levels of TIM-1 in the surface of  
572 uninfected or CHIKV-infected VeroS cells were assessed via receptor staining using a TIM-1  
573 antibody **(A)** or binding of fluorescently labeled liposomes **(B)** and analyzed through flow cy-  
574 tometry. **(C)** VeroS cells were infected with either CHIKV-GFP (top, MOI 0.5) or LCMV-GFP  
575 (bottom, MOI 1) resulting in similar levels of infection. **(D)** The total protein present in total cell  
576 lysates (TCL) and biotinylated surface proteins (SB) of uninfected, CHIKV, and LCMV-infected

577 VeroS cells were compared using a stain-free gel. **(E)** Immunoblot analysis of samples shown in  
578 panel D.

579 **Figure 8. Levels of surface TIM-1 start decreasing around 9hpi in a mechanism possibly me-**  
580 **diated by nsP2. (A)** CHIKV-GFP infected VeroS cells were infected at different time points, and  
581 all were harvested at the same time for surface biotinylation analysis. Infection was maintained  
582 for 0, 3, 6, 9 or 12 hours. Samples were probed using TIM-1, E1, or transferrin (Trfn) antibodies.  
583 **(B)** VeroS cells were infected with CHIKV at different time points, and subjected to fluorescent  
584 liposome binding simultaneously. Infection was maintained for 0, 3, 6, 9, 12, 15, or 18 hours and  
585 analyzed through flow cytometry. **(C)** Quantification of fluorescent PC:PE:PS liposomes. **(D)**  
586 Cells were transfected with plasmids encoding CHIKV proteins for 48 hours and analyzed  
587 through binding of fluorescently labeled liposomes using flow cytometry. Liposome binding  
588 was compared to control cells to determine the relative liposome binding levels. Data represents  
589 the mean  $\pm$ SEM from at least three independent trials. An ordinary one-way ANOVA with mul-  
590 tiple comparisons was used to evaluate statistical differences in comparison to control. An un-  
591 equal variance (Welch's correction) t-test was performed for normalized data. \*,  $p < .05$ ; \*\*,  $p$   
592  $< .01$ ; \*\*\*\*,  $p < .0001$ .

593 **Figure 9. CHIKV release is decreased by TIM-1 binding to envelope PS. (A)** Diagram of  
594 mechanistic model displaying budding virions attached to TIM-1 in Vero cells and being re-  
595 leased efficiently from Vero $\Delta$ TIM/AXL cells. Nonstructural protein 2 (nsp2) decreases levels of  
596 TIM-1 over time possibly through cellular transcription shutoff. Created in BioRender.com

597 **Supplemental Figure 1. Exogenous expression of TIM, MXRA8, and L-SIGN increases cell**  
598 **lysate luminescence levels of CHIKV-infected cells.** Corresponding levels of luminescence pre-  
599 sent in the total cell lysates and supernatants collected from the release efficiency assay shown  
600 in Figure 3E. Data represents the mean  $\pm$ SEM from at least three independent trials.

601 **Supplemental Figure 2. Raw luminescence levels of CHIKV-infected HAP1 and Vero cells**  
602 **knocked out for CDC50a. (A)** Corresponding levels of luminescence present in the total cell ly-  
603 sates and supernatants collected from HAP1 and HAP1 $\Delta$ CDC50 release efficiency assay shown  
604 in Figure 4C. **(B)** Corresponding levels of luminescence present in the total cell lysates and su-  
605 pernatants collected from VeroS and VeroS $\Delta$ CDC50 release efficiency assay shown in Figure 5D  
606 or **(C)** with equalized cell lysate levels as shown in Figure 5E. Data represents the mean  $\pm$ SEM  
607 from at least three independent trials.

608 **Supplemental Figure 3. Luminescence levels from release efficiency assay in a panel of**  
609 **mammalian and mosquito cell lines.** Corresponding levels of luminescence present in the total  
610 cell lysates and supernatants collected from release efficiency assay shown in Figure 6A. Data  
611 represents the mean  $\pm$ SEM from at least three independent trials.

612 **Supplemental Figure 4. Quantification of surface biotinylation samples of CHIKV-infected**  
613 **cells.** (A) Total cell lysate and surface biotinylated proteins of uninfected, CHIKV or  
614 LCMV-infected VeroS cells were quantified using densitometry analysis.

615 **Supplemental Figure 5. Production of exogenous expression of CHIKV proteins in VeroS**  
616 **cells.** Stain-free gel analysis of **(A)** total cell lysates or **(B)** surface biotinylation proteins infected  
617 with CHIKV for different periods. **(C)** Exogenous expression of CHIKV non-structural proteins  
618 tagged with FLAG tag was analyzed through SDS-PAGE using an antibody against FLAG or  
619 transferrin as loading control. nsP1 was quickly detected in the cell lysates of transfection cells  
620 but longer exposure (right) was needed for detection of nsP2, nsP3, and nsP4. **(D)** Exogenous  
621 expression of CHIKV structural proteins was analyzed using an antibody against CHIKV E1 or  
622 transferrin as a loading control.

623 **ACKNOWLEDGMENTS**

624 We would like to thank James Barber in the College of Veterinary Medicine flow cytometer core  
625 at the University of Georgia for his technical assistance. We also thank current and past members  
626 of the Brindley lab for helpful comments on the manuscript.

## 627 **FUNDING**

628 This material is based upon work supported by the National Science Foundation Graduate Re-  
629 search Fellowship Program under Grant Nos 1842396 (J.M.R.B.) and 1443117 (K.L.M.). A.J. was  
630 supported by the NIH Post-baccalaureate Training in Infectious Disease Research (GM109435).  
631 The research reported in this publication was supported by the National Institute of Allergy and  
632 Infectious Diseases of the National Institutes of Health under Award Number R01AI139238  
633 (M.A.B.).

## 634 **AUTHOR CONTRIBUTIONS**

635 Conceptualization, M.A.B., and J.M.R.B.; methodology, M.A.B., and J.M.R.B.; formal analysis,  
636 M.A.B. and J.M.R.B.; investigation, J.M.R.B., A.J.H., J.T.N., M.D.A., K.L.M., S.A.H., G.A.L.T.,  
637 A.D., D.N.B., A.R.J., M.A.B.; data curation, J.M.R.B.; writing—original draft preparation,  
638 J.M.R.B.; writing—review and editing, J.M.R.B., A.J.H., J.T.N., M.D.A., K.L.M., S.A.H., G.A.L.T.,  
639 A.D., D.N.B., A.R.J., M.A.B.; visualization, J.M.R.B., M.A.B.; supervision, M.A.B.; project admin-  
640 istration, M.A.B.; funding acquisition, J.M.R.B., K.L.M., A.R.J., M.A.B. All authors have read and  
641 agreed to the published version of the manuscript.

## 642 **References**

- 643 1. Caglioti C, Lalle E, Castilletti C, Carletti F, Capobianchi MR, Bordi L. 2013. Chikungunya virus infec-  
644 tion: an overview. *New Microbiol* 36:211–227.
- 645 2. Yap ML, Klose T, Urakami A, Hasan SS, Akahata W, Rossmann MG. 2017. Structural studies of  
646 Chikungunya virus maturation. *Proc Natl Acad Sci* 114:13703–13707.
- 647 3. Chmielewski D, Schmid MF, Simmons G, Jin J, Chiu W. 2022. Chikungunya virus assembly and bud-  
648 ding visualized in situ using cryogenic electron tomography. *Nat Microbiol* 7:1270–1279.



- 649 4. Brown R, Wan J, Kielian M. 2018. The Alphavirus Exit Pathway: What We Know and What We Wish  
650 We Knew. *Viruses* 10:89.
- 651 5. Suomalainen M, Liljeström P, Garoff H. 1992. Spike protein-nucleocapsid interactions drive the bud-  
652 ding of alphaviruses. *J Virol* 66:4737–4747.
- 653 6. Owen KE, Kuhn RJ. 1997. Alphavirus Budding Is Dependent on the Interaction between the Nucle-  
654 ocapsid and Hydrophobic Amino Acids on the Cytoplasmic Domain of the E2 Envelope Glycopro-  
655 tein. *Virology* 230:187–196.
- 656 7. Ivanova L, Schlesinger MJ. 1993. Site-directed mutations in the Sindbis virus E2 glycoprotein identify  
657 palmitoylation sites and affect virus budding. *J Virol* 67:2546–2551.
- 658 8. Elmasri Z, Negi V, Kuhn RJ, Jose J. 2022. Requirement of a functional ion channel for Sindbis virus  
659 glycoprotein transport, CPV-II formation, and efficient virus budding. *PLOS Pathog* 18:e1010892.
- 660 9. Votteler J, Sundquist WI. 2013. Virus Budding and the ESCRT Pathway. *Cell Host Microbe* 14:232–241.
- 661 10. Jones PH, Maric M, Madison MN, Maury W, Roller RJ, Okeoma CM. 2013. BST-2/tetherin-mediated  
662 restriction of chikungunya (CHIKV) VLP budding is counteracted by CHIKV non-structural protein  
663 1 (nsP1). *Virology* 438:37–49.
- 664 11. Ooi Y, Dubé M, Kielian M. 2015. BST2/Tetherin Inhibition of Alphavirus Exit. *Viruses* 7:2147–2167.
- 665 12. Kaletsky RL, Francica JR, Agrawal-Gamse C, Bates P. 2009. Tetherin-mediated restriction of filovirus  
666 budding is antagonized by the Ebola glycoprotein. *Proc Natl Acad Sci* 106:2886–2891.
- 667 13. Perez-Caballero D, Zang T, Ebrahimi A, McNatt MW, Gregory DA, Johnson MC, Bieniasz PD. 2009.  
668 Tetherin Inhibits HIV-1 Release by Directly Tethering Virions to Cells. *Cell* 139:499–511.
- 669 14. Acciani MD, Brindley MA. 2022. Scrambled or flipped: 5 facts about how cellular phosphatidylserine  
670 localization can mediate viral replication. *PLoS Pathog* 18:e1010352.

- 671 15. Leventis PA, Grinstein S. 2010. The Distribution and Function of Phosphatidylserine in Cellular  
672 Membranes. *Annu Rev Biophys* 39:407–427.
- 673 16. Segawa K, Nagata S. 2015. An Apoptotic ‘Eat Me’ Signal: Phosphatidylserine Exposure. *Trends Cell*  
674 *Biol* 25:639–650.
- 675 17. Reyes Ballista JM, Miazgowicz KL, Acciani MD, Jimenez AR, Belloli RS, Havranek KE, Brindley MA.  
676 2023. Chikungunya virus entry and infectivity is primarily facilitated through cell line dependent  
677 attachment factors in mammalian and mosquito cells. *Front Cell Dev Biol* 11:1085913.
- 678 18. Moller-Tank S, Kondratowicz AS, Davey RA, Rennert PD, Maury W. 2013. Role of the phosphatidyl-  
679 serine receptor TIM-1 in enveloped-virus entry. *J Virol* 87:8327–41.
- 680 19. Kirui J, Abidine Y, Lenman A, Islam K, Gwon YD, Lasswitz L, Evander M, Bally M, Gerold G. 2021.  
681 The Phosphatidylserine Receptor TIM-1 Enhances Authentic Chikungunya Virus Cell Entry. *Cells*  
682 10.
- 683 20. Li M, Ablan SD, Miao C, Zheng Y-M, Fuller MS, Rennert PD, Maury W, Johnson MC, Freed EO, Liu  
684 S-L. 2014. TIM-family proteins inhibit HIV-1 release. *Proc Natl Acad Sci* 111.
- 685 21. Xie S, Liang Z, Yang X, Pan J, Yu D, Li T, Cao R. 2021. Japanese Encephalitis Virus NS2B-3 Protein  
686 Complex Promotes Cell Apoptosis and Viral Particle Release by Down-Regulating the Expression of  
687 AXL. *Virol Sin* 36:1503–1519.
- 688 22. Ramjag A, Cutrone S, Lu K, Crasto C, Jin J, Bakkour S, Carrington CVF, Simmons G. 2022. A  
689 high-throughput screening assay to identify inhibitory antibodies targeting alphavirus release. *Virol*  
690 *J* 19:170.
- 691 23. McIntire JJ, Umetsu DT, DeKruyff RH. 2004. TIM-1, a novel allergy and asthma susceptibility gene.  
692 *Springer Semin Immunopathol* 25:335–348.

- 693 24. Moller-Tank S, Maury W. 2014. Phosphatidylserine receptors: Enhancers of enveloped virus entry  
694 and infection. *Virology* 468–470:565–580.
- 695 25. Zhang R, Kim AS, Fox JM, Nair S, Basore K, Klimstra WB, Rimkunas R, Fong RH, Lin H, Poddar S,  
696 Crowe JE, Doranz BJ, Fremont DH, Diamond MS. 2018. Mxra8 is a receptor for multiple arthritogenic  
697 alphaviruses. *Nature* 557:570–574.
- 698 26. Klimstra WB, Nangle EM, Smith MS, Yurochko AD, Ryman KD. 2003. DC-SIGN and L-SIGN Can Act  
699 as Attachment Receptors for Alphaviruses and Distinguish between Mosquito Cell- and Mammalian  
700 Cell-Derived Viruses. *J Virol* 77:12022–12032.
- 701 27. Shimojima M, Takada A, Ebihara H, Neumann G, Fujioka K, Irimura T, Jones S, Feldmann H, Kawakawa  
702 Y. 2006. Tyro3 family-mediated cell entry of Ebola and Marburg viruses. *J Virol* 80:10109–16.
- 703 28. Landi A, Iannucci V, Nuffel AV, Meuwissen P, Verhasselt B. 2011. One protein to rule them all: modulation  
704 of cell surface receptors and molecules by HIV Nef. *Curr HIV Res* 9:496–504.
- 705 29. Schneider-Schaulies J, Schnorr JJ, Brinckmann U, Dunster LM, Baczko K, Liebert UG, Schneider-  
706 Schaulies S, ter Meulen V. 1995. Receptor usage and differential downregulation of CD46 by  
707 measles virus wild-type and vaccine strains. *Proc Natl Acad Sci U S A* 92:3943–3947.
- 708 30. Breiner KM, Urban S, Glass B, Schaller H. 2001. Envelope protein-mediated down-regulation of hepatitis  
709 B virus receptor in infected hepatocytes. *J Virol* 75:143–150.
- 710 31. Li M, Waheed AA, Yu J, Zeng C, Chen H-Y, Zheng Y-M, Feizpour A, Reinhard BM, Gummuluru S,  
711 Lin S, Freed EO, Liu S-L. 2019. TIM-mediated inhibition of HIV-1 release is antagonized by Nef but  
712 potentiated by SERINC proteins. *Proc Natl Acad Sci* 116:5705–5714.
- 713 32. Stitt TN, Conn G, Gore M, Lai C, Bruno J, Radziejewski C, Mattsson K, Fisher J, Gies DR, Jones PF.  
714 1995. The anticoagulation factor protein S and its relative, Gas6, are ligands for the Tyro 3/Axl family  
715 of receptor tyrosine kinases. *Cell* 80:661–670.

- 716 33. Morizono K, Xie Y, Olafsen T, Lee B, Dasgupta A, Wu AM, Chen ISY. 2011. The Soluble Serum Pro-  
717 tein Gas6 Bridges Virion Envelope Phosphatidylserine to the TAM Receptor Tyrosine Kinase Axl to  
718 Mediate Viral Entry. *Cell Host Microbe* 9:286–298.
- 719 34. Bevers EM, Williamson PL. 2016. Getting to the Outer Leaflet: Physiology of Phosphatidylserine Ex-  
720 posure at the Plasma Membrane. *Physiol Rev* 96:605–645.
- 721 35. Kerr D, Gong Z, Suwatthee T, Luoma A, Roy S, Scarpaci R, Hwang HL, Henderson JM, Cao KD, Bu  
722 W, Lin B, Tietjen GT, Steck TL, Adams EJ, Lee KYC. 2021. How Tim proteins differentially exploit  
723 membrane features to attain robust target sensitivity. *Biophys J* 120:4891–4902.
- 724 36. Scott HL, Heberle FA, Katsaras J, Barrera FN. 2019. Phosphatidylserine Asymmetry Promotes the  
725 Membrane Insertion of a Transmembrane Helix. *Biophys J* 116:1495–1506.
- 726 37. Reitmayer CM, Levitt E, Basu S, Atkinson B, Fragkoudis R, Merits A, Lumley S, Lerner W, Diaz AV,  
727 Rooney S, Thomas CJE, Von Wyschetzki K, Rausalu K, Alphey L. 2023. Mimicking superinfection  
728 exclusion disrupts alphavirus infection and transmission in the yellow fever mosquito *Aedes aegypti*.  
729 *Proc Natl Acad Sci* 120:e2303080120.
- 730 38. Cherkashchenko L, Rausalu K, Basu S, Alphey L, Merits A. 2022. Expression of Alphavirus Non-  
731 structural Protein 2 (nsP2) in Mosquito Cells Inhibits Viral RNA Replication in Both a Protease Ac-  
732 tivity-Dependent and -Independent Manner. *Viruses* 14:1327.
- 733 39. Akhrymuk I, Lukash T, Frolov I, Frolova EI. 2019. Novel Mutations in nsP2 Abolish Chikungunya  
734 Virus-Induced Transcriptional Shutoff and Make the Virus Less Cytopathic without Affecting Its  
735 Replication Rates. *J Virol* 93:e02062-18.
- 736 40. Jose J, Taylor AB, Kuhn RJ. 2017. Spatial and Temporal Analysis of Alphavirus Replication and As-  
737 sembly in Mammalian and Mosquito Cells. *mBio* 8:e02294-16.

- 738 41. Brouillette RB, Phillips EK, Patel R, Mahauad-Fernandez W, Moller-Tank S, Rogers KJ, Dillard JA,  
739 Cooney AL, Martinez-Sobrido L, Okeoma C, Maury W. 2018. TIM-1 Mediates Dystrogly-  
740 can-Independent Entry of Lassa Virus. *J Virol* 92.
- 741 42. Ono N, Tatsuo H, Hidaka Y, Aoki T, Minagawa H, Yanagi Y. 2001. Measles Viruses on Throat Swabs  
742 from Measles Patients Use Signaling Lymphocytic Activation Molecule (CDw150) but Not CD46 as  
743 a Cellular Receptor. *J Virol* 75:4399–4401.
- 744 43. Buchholz UJ, Finke S, Conzelmann K-K. 1999. Generation of Bovine Respiratory Syncytial Virus  
745 (BRSV) from cDNA: BRSV NS2 Is Not Essential for Virus Replication in Tissue Culture, and the  
746 Human RSV Leader Region Acts as a Functional BRSV Genome Promoter. *J Virol* 73:251–259.
- 747 44. Dorighello G, McPhee M, Halliday K, Dellaire G, Ridgway ND. 2023. Differential contributions of  
748 phosphotransferases CEPT1 and CHPT1 to phosphatidylcholine homeostasis and lipid droplet bio-  
749 genesis. *J Biol Chem* 299:104578.
- 750 45. Lay Mendoza MF, Acciani MD, Levit CN, Santa Maria C, Brindley MA. 2020. Monitoring Viral Entry  
751 in Real-Time Using a Luciferase Recombinant Vesicular Stomatitis Virus Producing SARS-CoV-2,  
752 EBOV, LASV, CHIKV, and VSV Glycoproteins. *Viruses* 12.
- 753 46. Acciani MD, Lay Mendoza MF, Havranek KE, Duncan AM, Iyer H, Linn OL, Brindley MA. 2021.  
754 Ebola virus requires phosphatidylserine scrambling activity for efficient budding and optimal in-  
755 fectivity. *J Virol* JVI0116521.
- 756 47. Soh TK, Whelan SPJ. 2015. Tracking the Fate of Genetically Distinct Vesicular Stomatitis Virus Matrix  
757 Proteins Highlights the Role for Late Domains in Assembly. *J Virol* 89:11750–11760.
- 758 48. Cheng BYH, Ortiz-Riaño E, de la Torre JC, Martínez-Sobrido L. 2015. Arenavirus Genome Rear-  
759 rangement for the Development of Live Attenuated Vaccines. *J Virol* 89:7373–7384.

- 760 49. Zhang L, Richard AS, Jackson CB, Ojha A, Choe H. 2020. Phosphatidylethanolamine and Phosphati-  
761 dylserine Synergize To Enhance GAS6/AXL-Mediated Virus Infection and Efferocytosis. *J Virol* 95.
- 762 50. Salvador B, Zhou Y, Michault A, Muench MO, Simmons G. 2009. Characterization of Chikungunya  
763 pseudotyped viruses: Identification of refractory cell lines and demonstration of cellular tropism  
764 differences mediated by mutations in E1 glycoprotein. *Virology* 393:33–41.
- 765

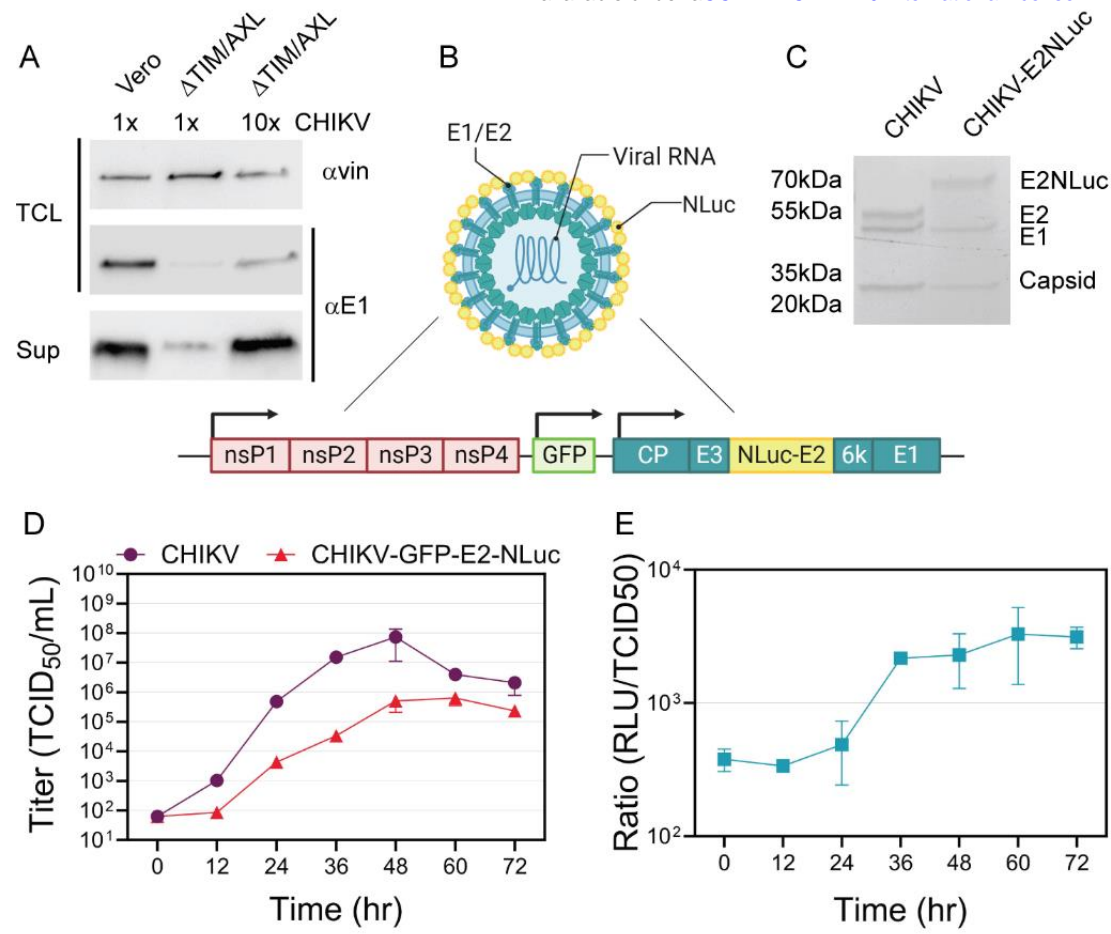

Figure 1

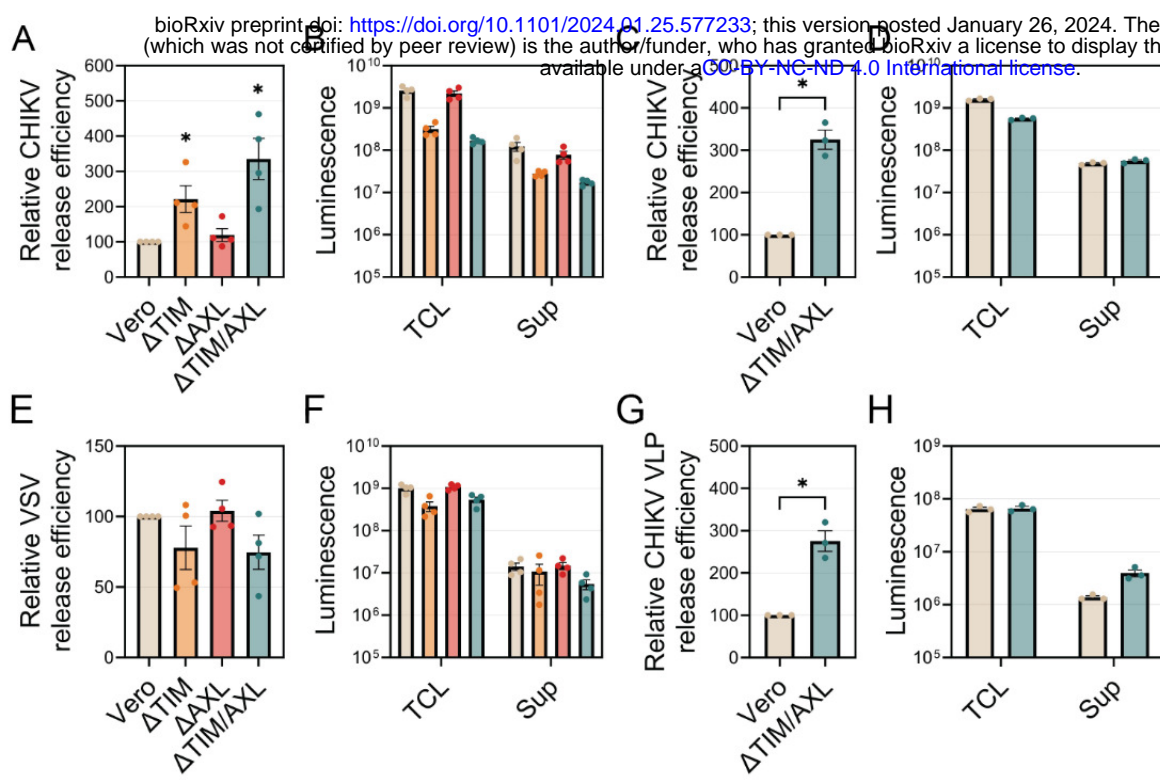

Figure 2



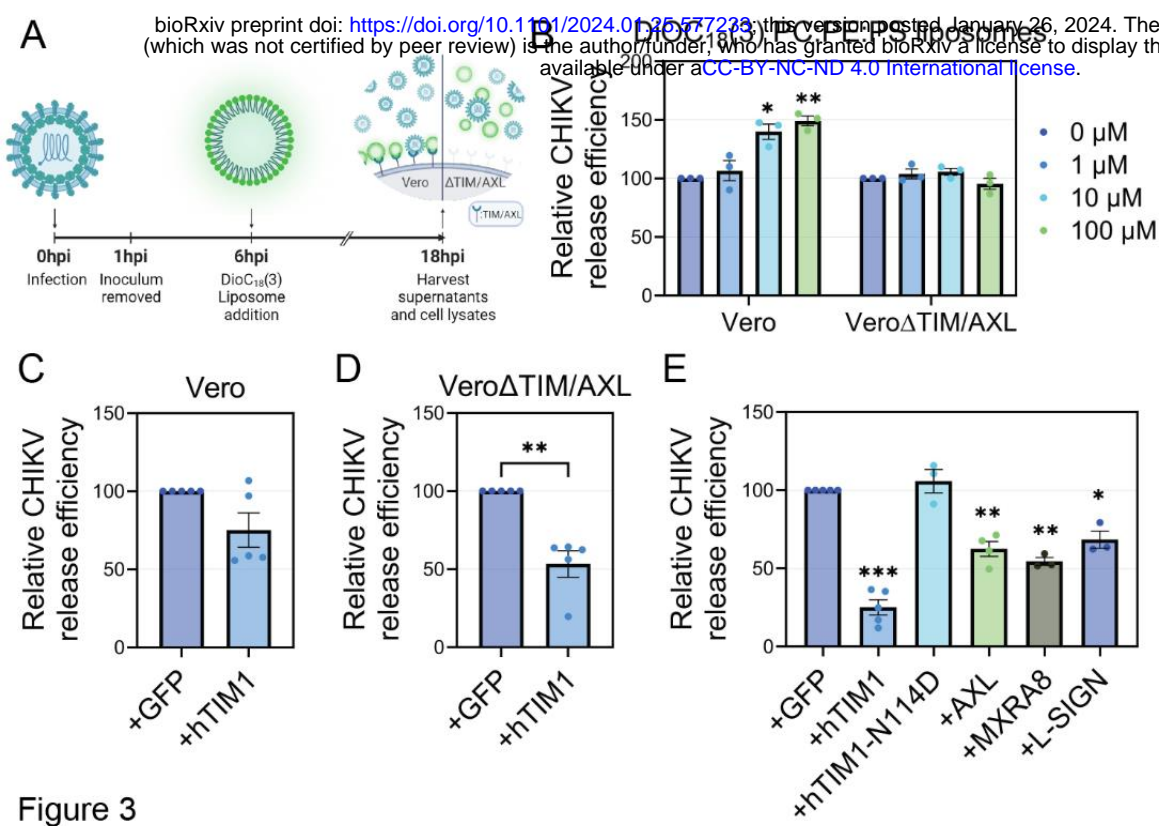

Figure 3

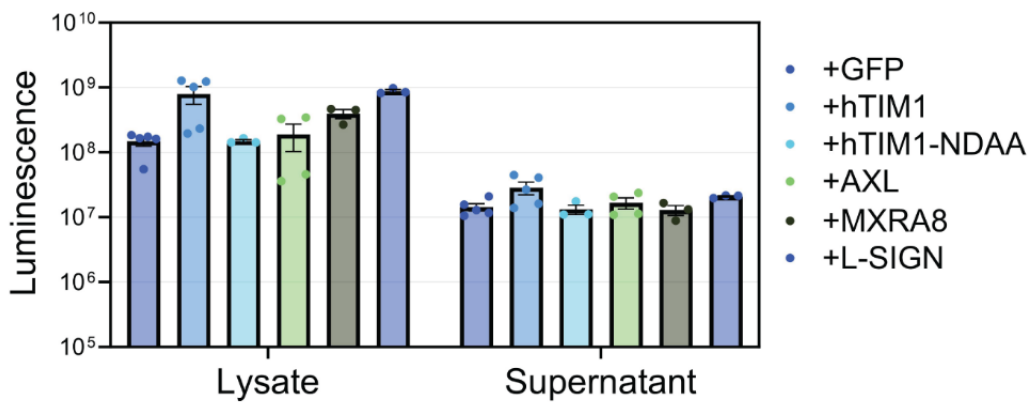

Sup Figure 1

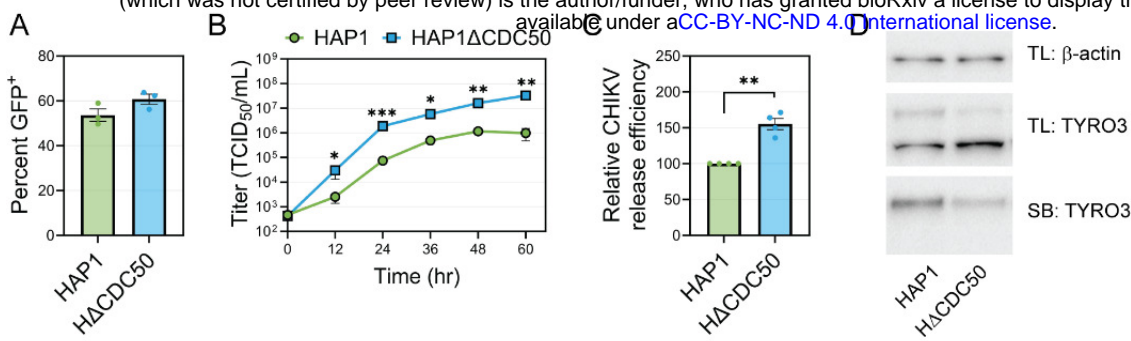

Figure 4

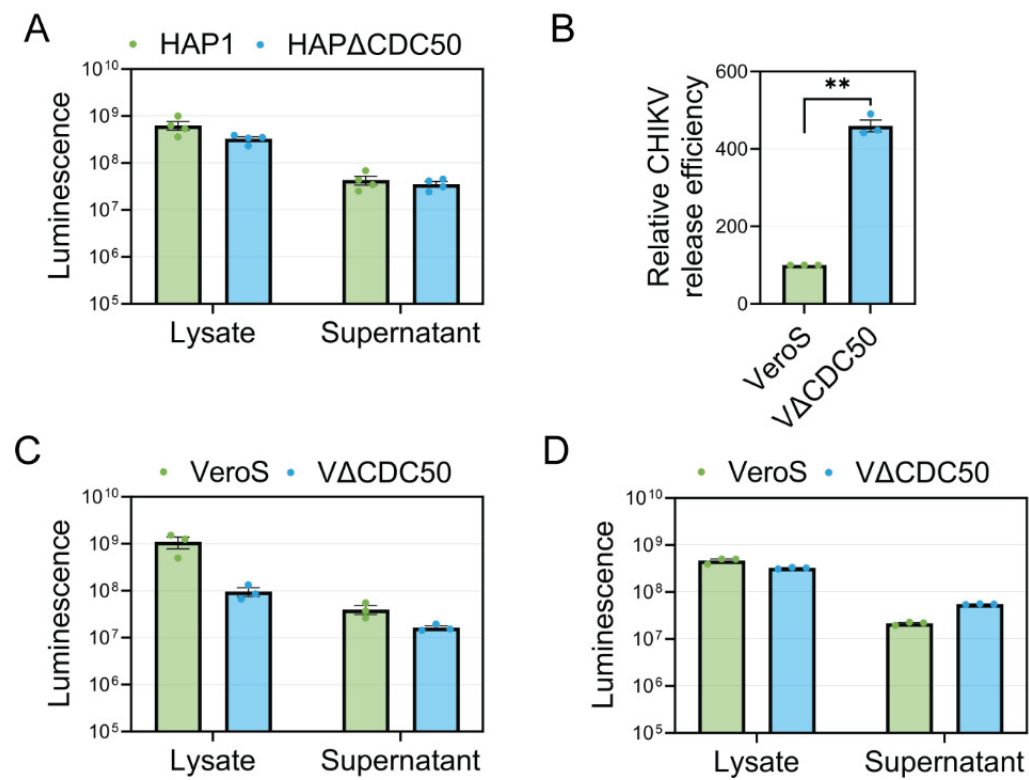

Sup Figure 2

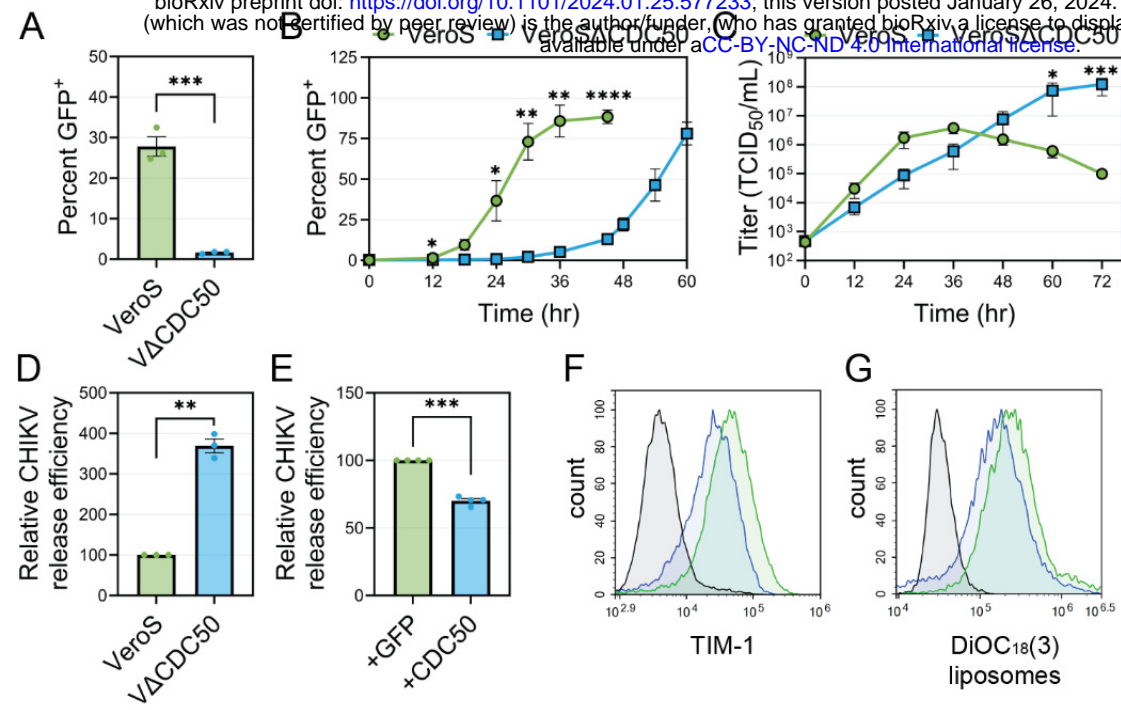

Figure 5

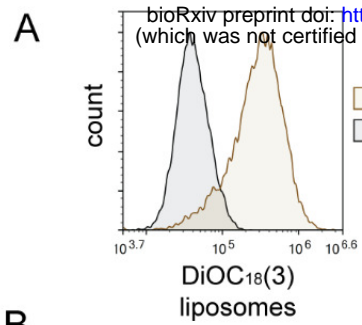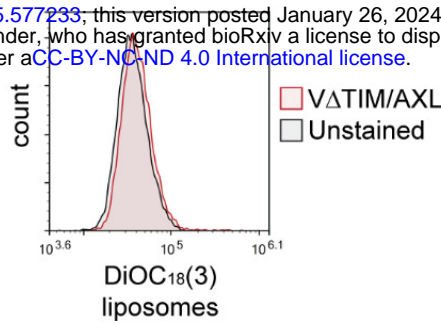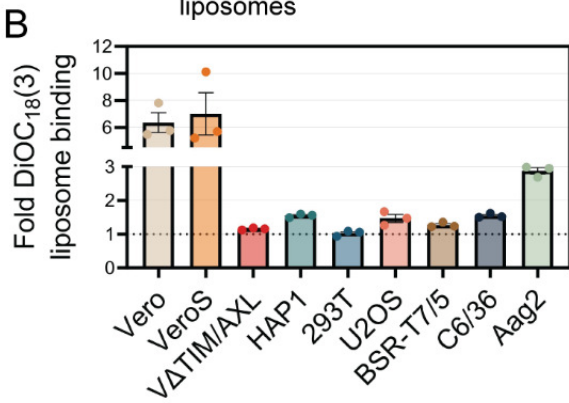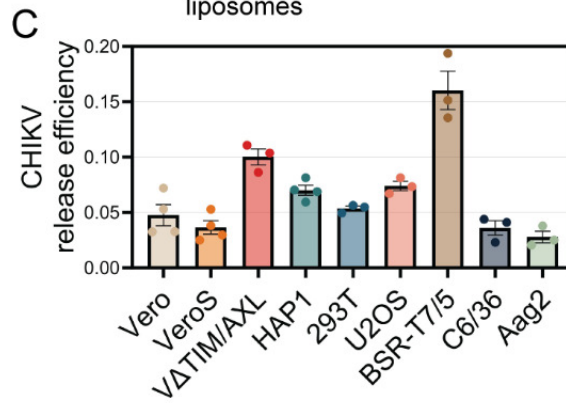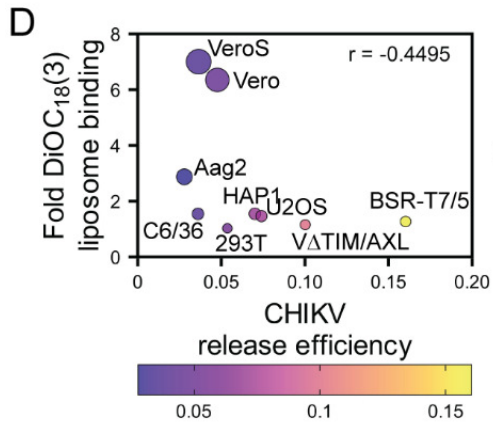

Figure 6

A

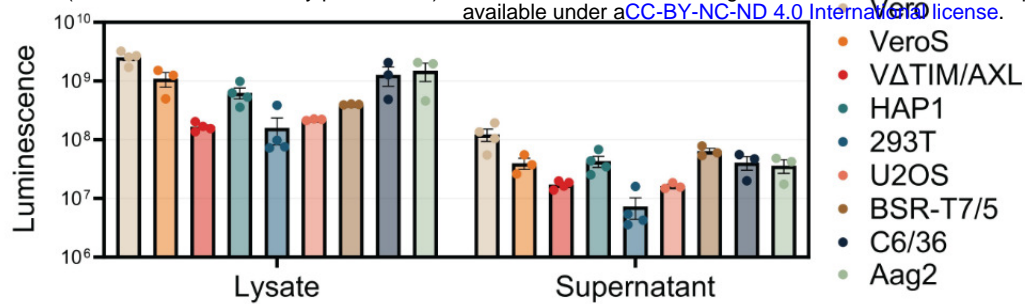

B

|                    | Vero | VeroS | V $\Delta$ TIM/AXL | HAP1 | 293T | C6/36 | Aag2 | U2OS |
|--------------------|------|-------|--------------------|------|------|-------|------|------|
| VeroS              | ns   |       |                    |      |      |       |      |      |
| V $\Delta$ TIM/AXL | **   | ***   |                    |      |      |       |      |      |
| HAP1               | ns   | ns    | ns                 |      |      |       |      |      |
| 293T               | ns   | ns    | *                  | ns   |      |       |      |      |
| C6/36              | ns   | ns    | ***                | ns   | ns   |       |      |      |
| Aag2               | ns   | ns    | ***                | *    | ns   | ns    |      |      |
| U2OS               | ns   | ns    | ns                 | ns   | ns   | ns    | *    |      |
| BSR-T7/5           | **** | ****  | **                 | **** | **** | ****  | **** | **** |

C

|                    | Vero | VeroS | V $\Delta$ TIM/AXL | HAP1 | 293T | C6/36 | Aag2 | U2OS |
|--------------------|------|-------|--------------------|------|------|-------|------|------|
| VeroS              | ns   |       |                    |      |      |       |      |      |
| V $\Delta$ TIM/AXL | ***  | ****  |                    |      |      |       |      |      |
| HAP1               | ***  | ****  | ns                 |      |      |       |      |      |
| 293T               | ***  | ****  | ns                 | ns   |      |       |      |      |
| C6/36              | ***  | ****  | ns                 | ns   | ns   |       |      |      |
| Aag2               | *    | **    | ns                 | ns   | ns   | ns    |      |      |
| U2OS               | ***  | ****  | ns                 | ns   | ns   | ns    | ns   |      |
| BSR-T7/5           | ***  | ****  | ns                 | ns   | ns   | ns    | ns   | ns   |

Sup Figure 3

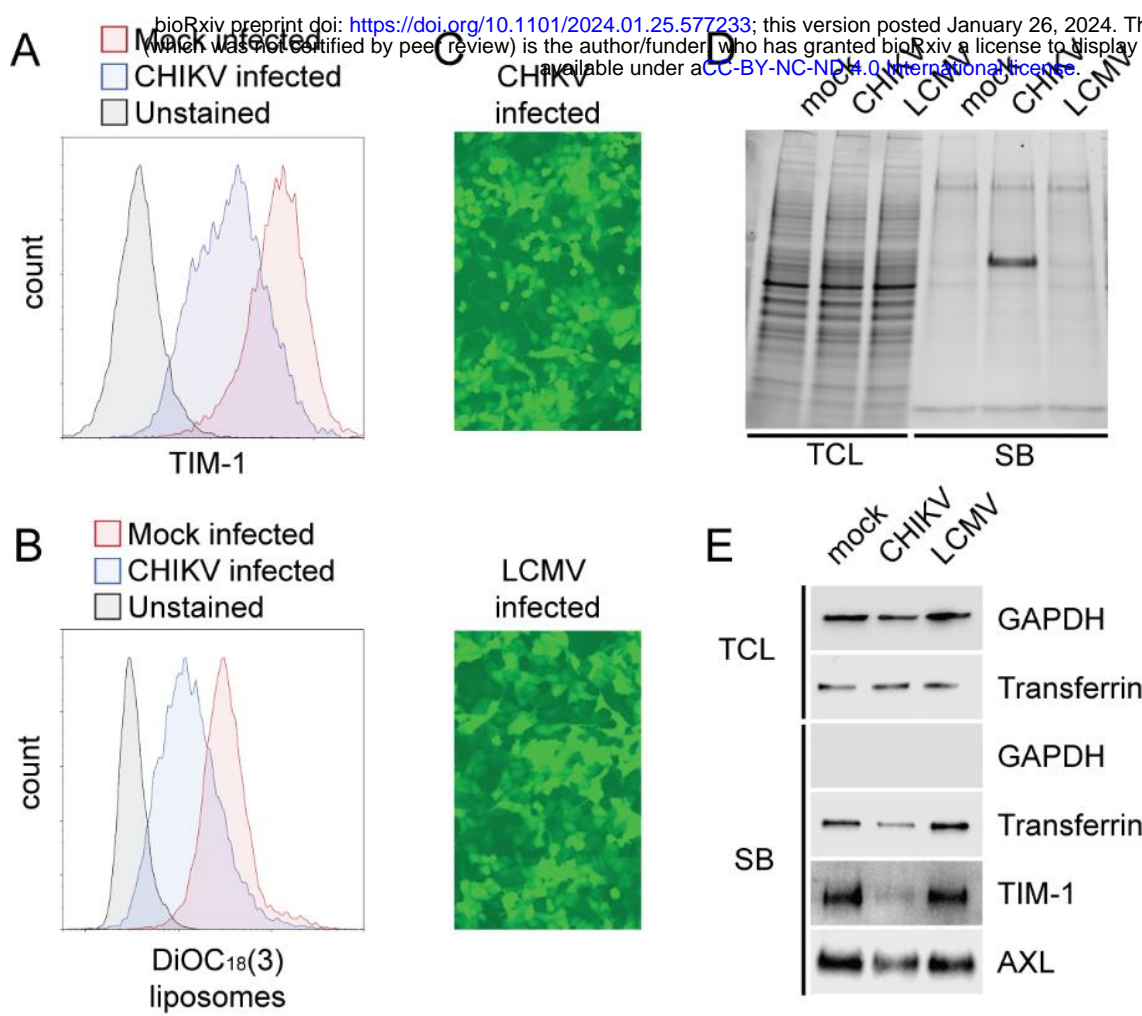

Figure 7

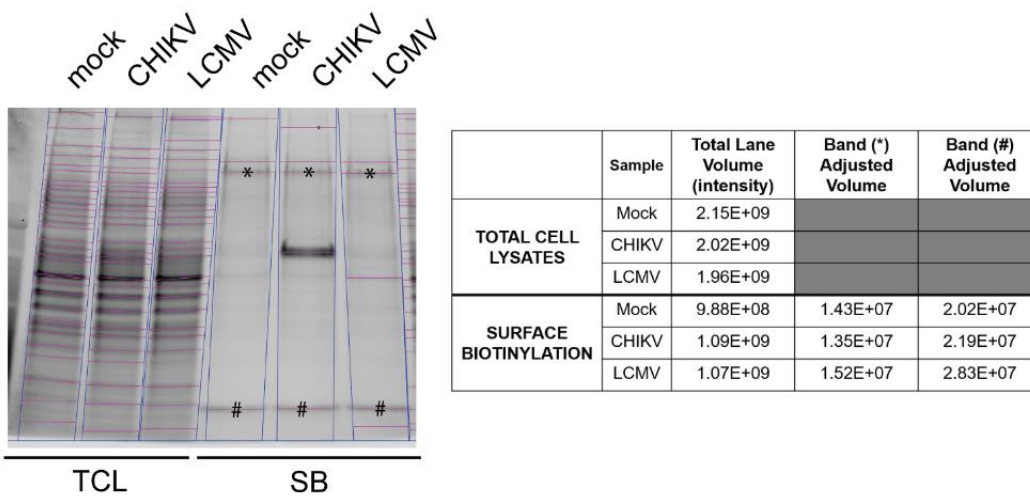

Sup Figure 4

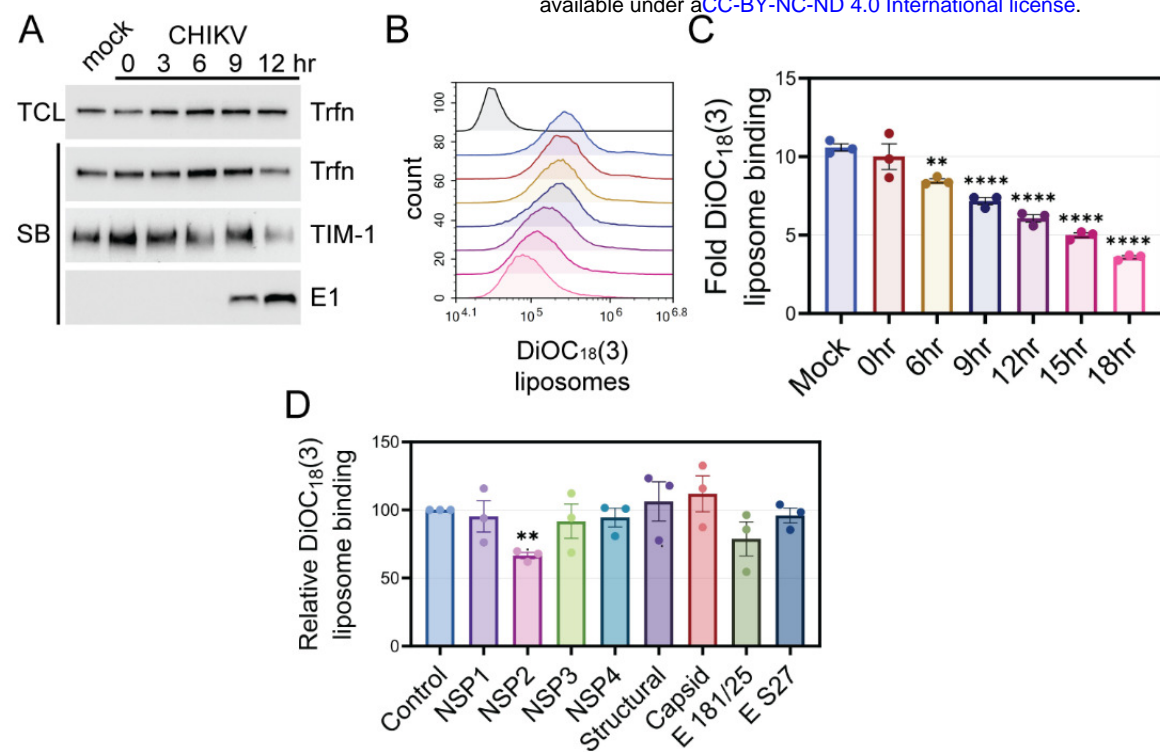

Figure 8

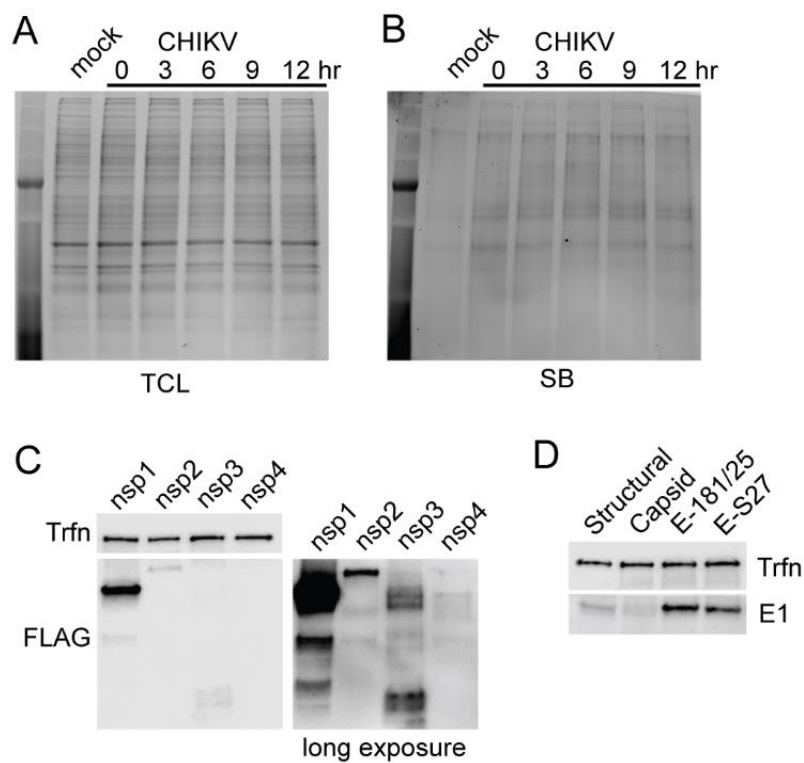

Sup Figure 5

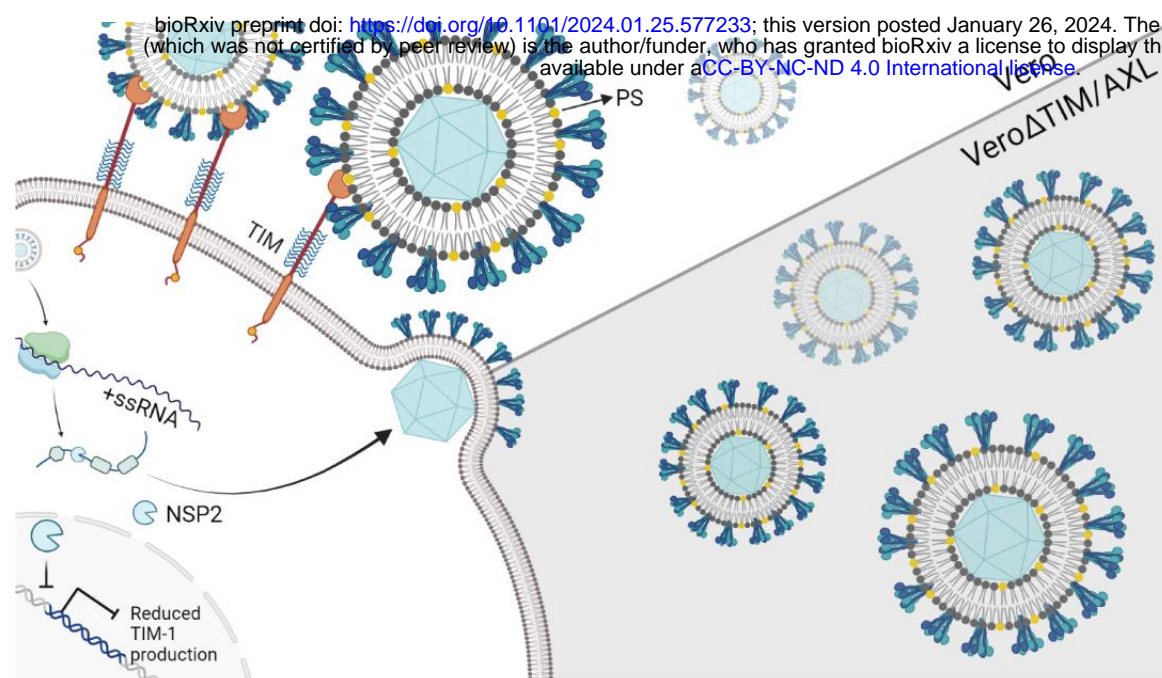

Figure 9
